# Supplementary material for: A Single-Run HPLC–MS Multiplex Assay for Therapeutic Drug Monitoring of Relevant First- and Second-Line Antibiotics in the Treatment of Drug-Resistant Tuberculosis
Source: MDPI journal article supplement (doi:10.3390/pharmaceutics15112543), 2023-10-27
Supplement: s1 [file s1]

Table S1. Analyte information.

| WHO group       | Analyte        | Product name                                                            | Producer      | order number | dissolved in         | C <sub>IS</sub> in extraction solvent [µg/ml] | C <sub>IS</sub> in extracted sample [µg/ml] |
|-----------------|----------------|-------------------------------------------------------------------------|---------------|--------------|----------------------|-----------------------------------------------|---------------------------------------------|
| Pan-susceptible | rifampicin     |                                                                         | Sigma Aldrich | R3501-250mg  | ACN                  | -                                             | -                                           |
|                 | D-rifampicin   | <sup>2</sup> H <sub>8</sub> -rifampicin                                 | Alsachim      | C2892        | ACN                  | 0.2143                                        | 0.15                                        |
|                 | rifabutin      |                                                                         | Sigma Aldrich | R3530-5mg    | ACN                  | -                                             | -                                           |
|                 | D-rifabutin    | <sup>2</sup> H <sub>6</sub> -rifabutin                                  | Alsachim      | C722         | ACN                  | 0.010714                                      | 0.0075                                      |
|                 | isoniazid      |                                                                         | Sigma Aldrich | I3377-5g     | ACN/H <sub>2</sub> O | -                                             | -                                           |
|                 | D-isoniazid    | <sup>2</sup> H <sub>4</sub> -isoniazid                                  | Alsachim      | C4675        | ACN/H <sub>2</sub> O | 0.10714                                       | 0.075                                       |
| Group A         |                |                                                                         |               |              |                      | -                                             |                                             |
|                 | levofloxacin   |                                                                         | Sigma Aldrich | 28266        | ACN/H <sub>2</sub> O | -                                             | -                                           |
|                 | D-levofloxacin | <sup>13</sup> C- <sup>2</sup> H <sub>3</sub> -levofloxacin              | Alsachim      | C1175        | ACN/H <sub>2</sub> O | 0.17857                                       | 0.125                                       |
|                 | moxifloxacin   | moxifloxacin hydrochloride                                              | Molekula GmbH | 85126157-1g  | ACN/H <sub>2</sub> O | -                                             | -                                           |
|                 | D-moxifloxacin | <sup>2</sup> H <sub>5</sub> -moxifloxacin trifluoroacetate              | Alsachim      | C4633        | ACN/H <sub>2</sub> O | 0.0714                                        | 0.05                                        |
|                 | bedaquiline    |                                                                         | Adooq         | A12327-5     | ACN                  | -                                             | -                                           |
|                 | D-bedaquiline  | <sup>2</sup> H <sub>6</sub> -bedaquiline                                | Alsachim      | C7342        | ACN                  | 0.02143                                       | 0.015                                       |
|                 | linezolid      |                                                                         | Sigma Aldrich | PZ0014-5mg   | ACN                  | -                                             | -                                           |
| Un-<br>classfd  | D-linezolid    | <sup>2</sup> H <sub>8</sub> -linezolid                                  | Alsachim      | C1040        | ACN                  | 0.10714                                       | 0.075                                       |
|                 | pretomanid     |                                                                         | Sigma Aldrich | SML1290-10MG | ACN                  | -                                             | -                                           |
|                 |                |                                                                         |               |              |                      | -                                             |                                             |
|                 | clofazimine    |                                                                         | Sigma Aldrich | C8895-1g     | ACN                  | -                                             | -                                           |
|                 | D-clofazimine  | <sup>2</sup> H <sub>6</sub> -clofazimine                                | Alsachim      | C7167        | ACN                  | 0.010714                                      | 0.0075                                      |
|                 | cycloserine    |                                                                         | Sigma Aldrich | C3909-25mg   | H <sub>2</sub> O     | -                                             | -                                           |
|                 | D-cycloserine  | <sup>2</sup> H <sub>3</sub> - <sup>15</sup> N-cycloserine tartaric acid | Alsachim      | C7114        | H <sub>2</sub> O     | 0.286                                         | 0.2                                         |
|                 | ethambutol     | ethambutol dihydrochloride                                              | Sigma Aldrich | E4630-25mg   | ACN/H <sub>2</sub> O | -                                             | -                                           |
|                 | D-ethambutol   | <sup>2</sup> H <sub>4</sub> -ethambutol dihydrochloride                 | Alsachim      | C7385        | ACN/H <sub>2</sub> O | 0.0571                                        | 0.04                                        |
|                 |                |                                                                         |               |              |                      |                                               |                                             |

|                                |                 |                                                                           |               |               |                      |          |        |
|--------------------------------|-----------------|---------------------------------------------------------------------------|---------------|---------------|----------------------|----------|--------|
| Non-D<br>excluded<br>int. Std. | delamanid       |                                                                           | BioVision     | 2280-5        | ACN                  | -        | -      |
|                                | D-delamanid     | <sup>2</sup> H <sub>5</sub> -delamanid                                    | Alsachim      | C7346         | ACN                  | 0.010714 | 0.0075 |
|                                | pyrazinamide    |                                                                           | Sigma Aldrich | P7136-10g     | ACN                  | -        | -      |
|                                | D-pyrazinamide  | <sup>13</sup> C <sub>2</sub> - <sup>15</sup> N <sub>2</sub> -pyrazinamide | Alsachim      | C6595         | ACN                  | 0.286    | 0.2    |
|                                | meropenem       | meropenem trihydrate                                                      | Sigma Aldrich | 32460-25mg    | H <sub>2</sub> O     | -        | -      |
|                                | D-meropenem     | <sup>2</sup> H <sub>6</sub> -meropenem                                    | Alsachim      | C1298         | H <sub>2</sub> O     | 0.2143   | 0.15   |
|                                | clavulanic acid | clavulanate lithium                                                       | Sigma Aldrich | 1134426-200mg | H <sub>2</sub> O     | -        | -      |
|                                | amikacin        |                                                                           | Sigma Aldrich | A0368000      | H <sub>2</sub> O     | -        | -      |
|                                | D-amikacin      | <sup>2</sup> H <sub>5</sub> -amikacin hydrochloride                       | Alsachim      | C6821         | H <sub>2</sub> O     | 0.714    | 0.5    |
|                                | streptomycin    | streptomycin sulphate                                                     | Sigma Aldrich | S6501-5g      | H <sub>2</sub> O     | -        | -      |
|                                | prothionamide   |                                                                           | Sigma Aldrich | SMB00387-1g   | ACN/H <sub>2</sub> O | -        | -      |
|                                | D-prothionamide | <sup>2</sup> H <sub>5</sub> -prothionamide                                | Alsachim      | C7344         | ACN/H <sub>2</sub> O | 0.0286   | 0.02   |
|                                | PAS             |                                                                           | Sigma Aldrich | A79604-5G     | H <sub>2</sub> O     | -        | -      |
|                                | D-PAS           | <sup>13</sup> C <sub>6</sub> -p-aminosalicylic acid                       | Alsachim      | C7345         | H <sub>2</sub> O     | 0.286    | 0.2    |
|                                |                 |                                                                           |               |               |                      | -        |        |
|                                | capreomycin IB* | capreomycin sulphate                                                      | Sigma Aldrich | C4142-1g      | H <sub>2</sub> O     | -        | -      |
|                                | capreomycin IA* |                                                                           |               |               |                      |          |        |
|                                | kanamycin       | kanamycin sulphate                                                        | Sigma Aldrich | K1377-1g      | H <sub>2</sub> O     | -        | -      |
|                                | D-kanamycin     | <sup>13</sup> C <sub>6</sub> -kanamycin A                                 | Alsachim      | C7347         | H <sub>2</sub> O     | 0.714    | 0.5    |
|                                |                 |                                                                           |               |               |                      | -        |        |
|                                | gentamicin      | gentamicin sulphate                                                       | Sigma Aldrich | G1940-250mg   | H <sub>2</sub> O     | 4.3      | 3      |

#: drug number; C<sub>IS</sub>: concentration of internal standard; D-: stable heavy hydrogen- or heavy carbon or -nitrogen labelled internal standards; <sup>X</sup>H<sub>Y</sub>, <sup>X</sup>C<sub>Y</sub>, and <sup>X</sup>N<sub>Y</sub>: X is the atomic mass of the stable isotope, Y the number of isotopes in the molecule; ACN: HPLC-grade acetonitrile; H<sub>2</sub>O: HPLC-grade water; \* capreomycin IB and IA are two out of four cyclic peptides with antimicrobial activity that are contained in the drug preparation of capreomycin.

**Table S2.** Donor characteristics and clinical routine laboratory parameters.

| parameter          | unit              | Pool     | P1    | P2    | P3    | P4    | P5    | P6    |
|--------------------|-------------------|----------|-------|-------|-------|-------|-------|-------|
| age                |                   |          | 29    | 33    | 47    | 29    | 26    | 32    |
| weight             |                   |          | 71    | 59    | 93    | 71    | 83    | 94    |
| height             |                   |          | 1.84  | 1.63  | 1.68  | 1.83  | 1.86  | 1.76  |
| BMI                | kg/m <sup>2</sup> | donor 1: |       |       |       |       |       |       |
|                    |                   | 25.8     |       |       |       |       |       |       |
|                    |                   | donor 2: | 20.98 | 22.21 | 32.95 | 20.52 | 23.99 | 30.35 |
|                    |                   | 25.2     |       |       |       |       |       |       |
|                    |                   | donor 3: |       |       |       |       |       |       |
|                    |                   | 22.9     |       |       |       |       |       |       |
| potassium*         | mmol/l            | 3.40     | 3.8   | 4     | 4.2   | 4.5   | 4.3   | 4.6   |
| sodium             | mmol/l            | 160      | 141   | 138   | 138   | 140   | 141   | 139   |
| chloride           | mmol/l            | 95       | 104   | 99    | 100   | 101   | 103   | 101   |
| calcium*           | mmol/l            | <1.25    | 2.27  | 2.57  | 2.27  | 2.3   | 2.34  | 2.39  |
| magnesium*         | mmol/l            | 0.41     | 0.75  | 0.82  | 0.7   | 0.77  | 0.78  | 0.94  |
| urea               | mg/dl             | 29       |       |       |       |       |       |       |
| uric acid          | mg/dl             | 3.0      |       |       |       |       |       |       |
| creatinine         | mg/dl             | 0.64     |       |       |       |       |       |       |
| total bilirubin    | mg/dl             | 0.4      |       |       |       |       |       |       |
| direct bilirubin   | mg/dl             | 0.1      |       |       |       |       |       |       |
| indirect bilirubin | mg/dl             | 0.3      |       |       |       |       |       |       |
| cholesterol        | mg/dl             | 166      | 160   | 222   | 186   | 161   | 140   | 175   |
| triglycerides      | mg/dl             | 38       | 58    | 173   | 104   | 262   | 39    | 149   |
| HDL                | mg/dl             | 69       | 73    | 70    | 61    | 44    | 51    | 49    |
| LDL                | mg/dl             | 89       | 75    | 117   | 104   | 65    | 81    | 96    |
| total protein      | g/l               | 65       | 74    | 78    | 75    | 85    | 80    | 81    |
| protein fractions  | albumin           | %        | 57.7  |       |       |       |       |       |
|                    | $\alpha_1$        | %        | 3.3   |       |       |       |       |       |
|                    | $\alpha_2$        | %        | 7.5   |       |       |       |       |       |
|                    | $\beta_1$         | %        | 6.0   |       |       |       |       |       |
|                    | $\beta_2$         | %        | 10.6  |       |       |       |       |       |
|                    | $\gamma$          | %        | 15.0  |       |       |       |       |       |

Pool: pooled plasma of three female donors; P1-P6: individual donors 1-6. BMI: body mass index; \* blood was collected using K<sub>2</sub>EDTA as anticoagulant, potassium might be artificially increase, calcium and magnesium complex-bound and artificially decreased.

---

**Table S3.** Mass spectrometer settings.

| Parameter                   | Value   |
|-----------------------------|---------|
| Cone gas flow               | 100 l/h |
| Desolvation gas flow        | 800 l/h |
| Extractor voltage           | 3.0 V   |
| Capillary voltage           | 3.0 kV  |
| Source temperature          | 90 °C   |
| Desolvation gas temperature | 450 °C  |

---

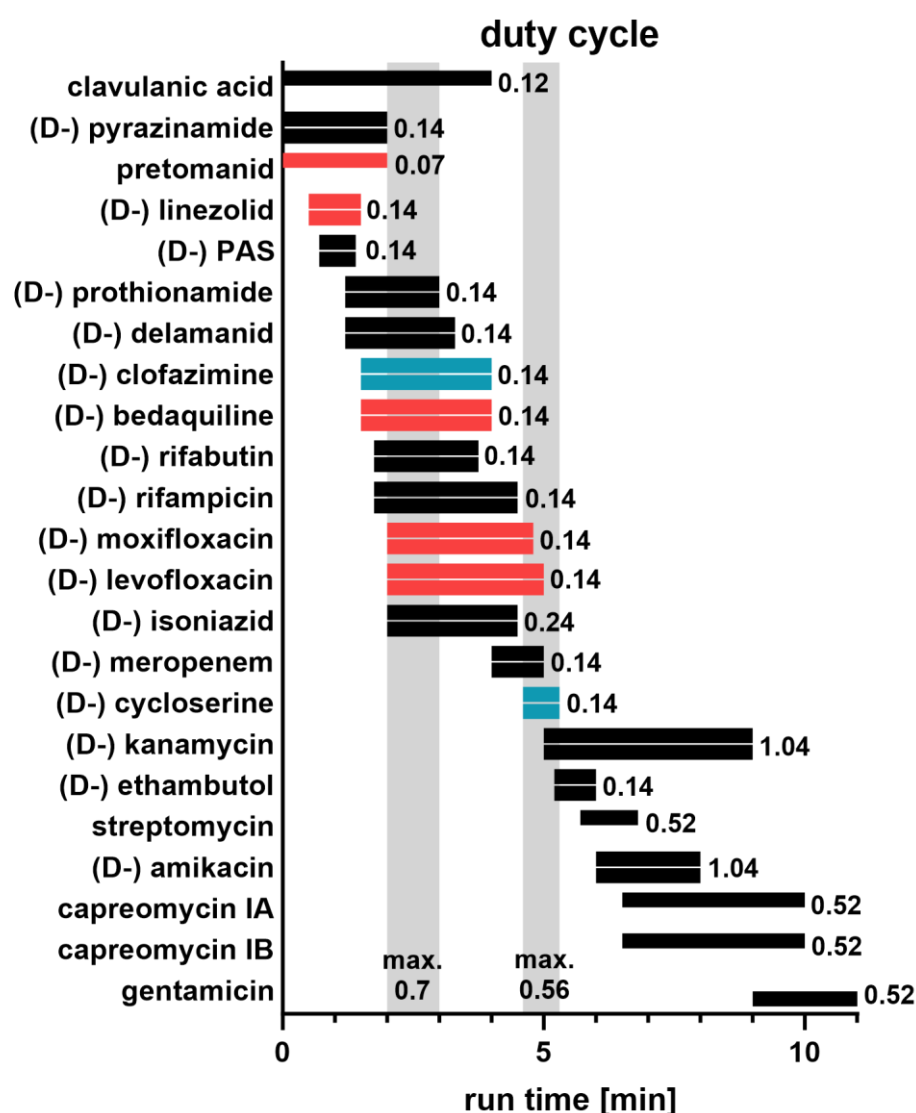

**Figure S1. MRM channels, channel activation and duty cycle duration.** Activation of the MRM channels over time. Start and end of each bar represent the start and end of the respective MRM channel. Identical stacked bars represent channels for an analyte and the respective stable isotope-labelled (D-) internal standard, e.g. pyrazinamide and D-pyrazinamide. Numbers indicate the total dwell time (dwell time + inter-channel delay) per (double-) channel. The duty cycle is the sum the total dwell time of all activated channels at a given run time. Grey areas indicate the run times with maximum duty cycle duration. During the first maximum, channels for (D-) prothionamide, (D-) delamanid, (D-) clofazimine, (D-) bedaquiline, and either (D-) moxifloxacin or (D-) levofloxacin would be activated resulting in a maximum duty cycle duration of 0.7 seconds. During the second maximum, channels for either (D-) moxifloxacin or (D-) levofloxacin, (D-) meropenem, (D-) cycloserine, and (D-) ethambutol were activated, resulting in a maximum duty cycle duration of 0.56 seconds. Red bars: group A drugs, turquoise bars: group B drugs, black bars: first-line, group C and WHO-excluded drugs.

**Table S4.** HPLC gradient.

| Time<br>[min] | A: 1% FA [%] | B: ACN<br>[%] | Flow rate<br>[mL/min] |
|---------------|--------------|---------------|-----------------------|
| 0.0           | 10           | 90            | 0.5                   |
| 1.0           | 10           | 90            | 0.5                   |
| 4.0           | 98           | 2             | 0.5                   |
| 4.1           | 98           | 2             | 0.8                   |
| 15.0          | 98           | 2             | 0.8                   |
| 24.0          | 10           | 90            | 0.8                   |
| 25.0          | 10           | 90            | 0.5                   |
| 29.0          | 10           | 90            | 0.5                   |

HPLC: high-performance liquid chromatography; 1% FA: 1% formic acid in HPLC-grade water; ACN: HPLC-grade acetonitrile.

**Table S5.** Calculation of chromatographic parameters.

| Parameter                  | Formula                                                                                                        |
|----------------------------|----------------------------------------------------------------------------------------------------------------|
|                            | $W = t_b - t_a$                                                                                                |
| Peak width at baseline $W$ | $W$ : peak width at baseline<br>$t_a$ : peak start<br>$t_b$ : peak end                                         |
|                            | $k = \frac{t_r - t_0}{t_0}$                                                                                    |
| Retention factor $k$       | $k$ : retention factor<br>$t_0$ : void time, retention time of an unretained analyte<br>$t_r$ : retention time |
|                            | $A_s = \frac{b}{a}$<br>with                                                                                    |
|                            | $a = t_r - t_a$<br>$b = t_b - t_r$                                                                             |
| Asymmetry factor $A_s$     | $A_s$ : Asymmetry factor<br>$b$ : trailing edge<br>$a$ : leading edge                                          |
|                            | $N = 16 \left( \frac{t_r}{W} \right)^2$                                                                        |
| Column efficiency $N$      | $N$ : Column efficiency<br>$t_r$ : retention time<br>$W$ : peak width at baseline                              |

Formulas according to (1).

Table S6. Chromatographic parameters of analyte peaks.

| WHO group    | Analyte          | Retention time $t_r$ [min]<br>median (90% range) | Peak width $W$ [min]<br>median (90% range) | Retention factor $k$<br>median (90% range) | Asymmetry factor $A_s$<br>median (90% range) | Column efficiency $N$<br>median (90% range) |
|--------------|------------------|--------------------------------------------------|--------------------------------------------|--------------------------------------------|----------------------------------------------|---------------------------------------------|
| First-line   | rifampicin       | 2.60 (2.43-2.89)                                 | 0.52 (0.46-0.68)                           | 2.55 (2.36-2.96)                           | 1.39 (0.92-1.82)                             | 384 (252-475)                               |
|              | rifabutin        | 2.91 (2.79-3.61)                                 | 0.62 (0.35-0.71)                           | 3.02 (2.84-3.96)                           | 1.58 (1.16-2.06)                             | 341 (264-1655)                              |
|              | isoniazid        | 2.81 (2.70-3.40)                                 | 0.64 (0.57-1.17)                           | 2.86 (2.71-3.64)                           | 1.89 (1.53-2.36)                             | 308 (87-419)                                |
| Group A      | levofloxacin     | 4.25 (4.08-4.51)                                 | 0.60 (0.41-1.13)                           | 4.84 (4.66-4.99)                           | 2.53 (1.75-4.42)                             | 794 (218-1794)                              |
|              | moxifloxacin     | 3.18 (2.77-4.20)                                 | 0.44 (0.28-0.97)                           | 3.36 (2.81-4.77)                           | 1.04 (0.47-1.85)                             | 727 (273-3651)                              |
|              | bedaquiline      | 2.52 (2.08-3.15)                                 | 0.56 (0.41-0.66)                           | 2.47 (1.86-3.33)                           | 1.46 (1.03-1.78)                             | 308 (241-937)                               |
|              | linezolid        | 1.06 (0.96-1.10)                                 | 0.55 (0.48-0.62)                           | 0.47 (0.42-0.51)                           | 1.57 (1.17-2.20)                             | 60 (45-81)                                  |
| Unclassified | pretomanid       | 1.00 (0.95-1.05)                                 | 0.43 (0.36-0.50)                           | 0.37 (0.31-0.43)                           | 2.71 (2.03-3.62)                             | 89 (60-129)                                 |
| Group B      | clofazimine      | 2.41 (2.02-2.88)                                 | 0.71 (0.54-1.02)                           | 2.14 (1.78-2.95)                           | 2.01 (1.34-3.07)                             | 174 (87-341)                                |
|              | cycloserine      | 4.99 (4.92-5.10)                                 | 0.12 (0.10-0.18)                           | 5.85 (5.76-6.00)                           | 1.05 (0.58-1.80)                             | 28021 (12492-45033)                         |
| Group C      | ethambutol       | 5.48 (5.45-5.62)                                 | 0.20 (0.14-0.33)                           | 6.55 (6.49-6.75)                           | 1.24 (0.81-2.47)                             | 12759 (4624-23775)                          |
|              | delamanid        | 1.87 (1.70-2.51)                                 | 0.51 (0.45-0.56)                           | 1.57 (1.32-2.45)                           | 1.65 (1.20-2.12)                             | 214 (176-434)                               |
|              | pyrazinamide     | 1.19 (1.16-1.21)                                 | 0.35 (0.31-0.42)                           | 0.64 (0.61-0.66)                           | 1.81 (1.25-2.37)                             | 183 (127-238)                               |
|              | meropenem        | 4.58 (4.43-4.68)                                 | 0.17 (0.13-0.23)                           | 5.30 (5.10-5.44)                           | 1.01 (0.69-1.49)                             | 11345 (6658-17538)                          |
|              | clavulanic acid* | 1.17*                                            | -                                          | -                                          | -                                            | -                                           |
|              | amikacin         | 6.94 (6.62-7.29)                                 | 0.50 (0.39-0.69)                           | 8.54 (8.10-9.02)                           | 1.30 (0.76-1.89)                             | 3097 (1620-5174)                            |
|              | streptomycin     | 6.12 (6.07-6.35)                                 | 0.33 (0.22-0.46)                           | 7.41 (7.35-7.73)                           | 1.48 (0.85-2.03)                             | 5412 (2829-12341)                           |
|              | prothionamide    | 1.76 (1.65-2.25)                                 | 0.63 (0.49-0.97)                           | 1.39 (1.28-2.07)                           | 1.91 (1.26-2.86)                             | 135 (68-214)                                |
|              | PAS              | 1.09 (0.98-1.21)                                 | 0.38 (0.18-0.44)                           | 0.50 (0.42-0.66)                           | 2.19 (0.81-2.72)                             | 133 (93-644)                                |





**Table S7.** MS2 scans of every compound.

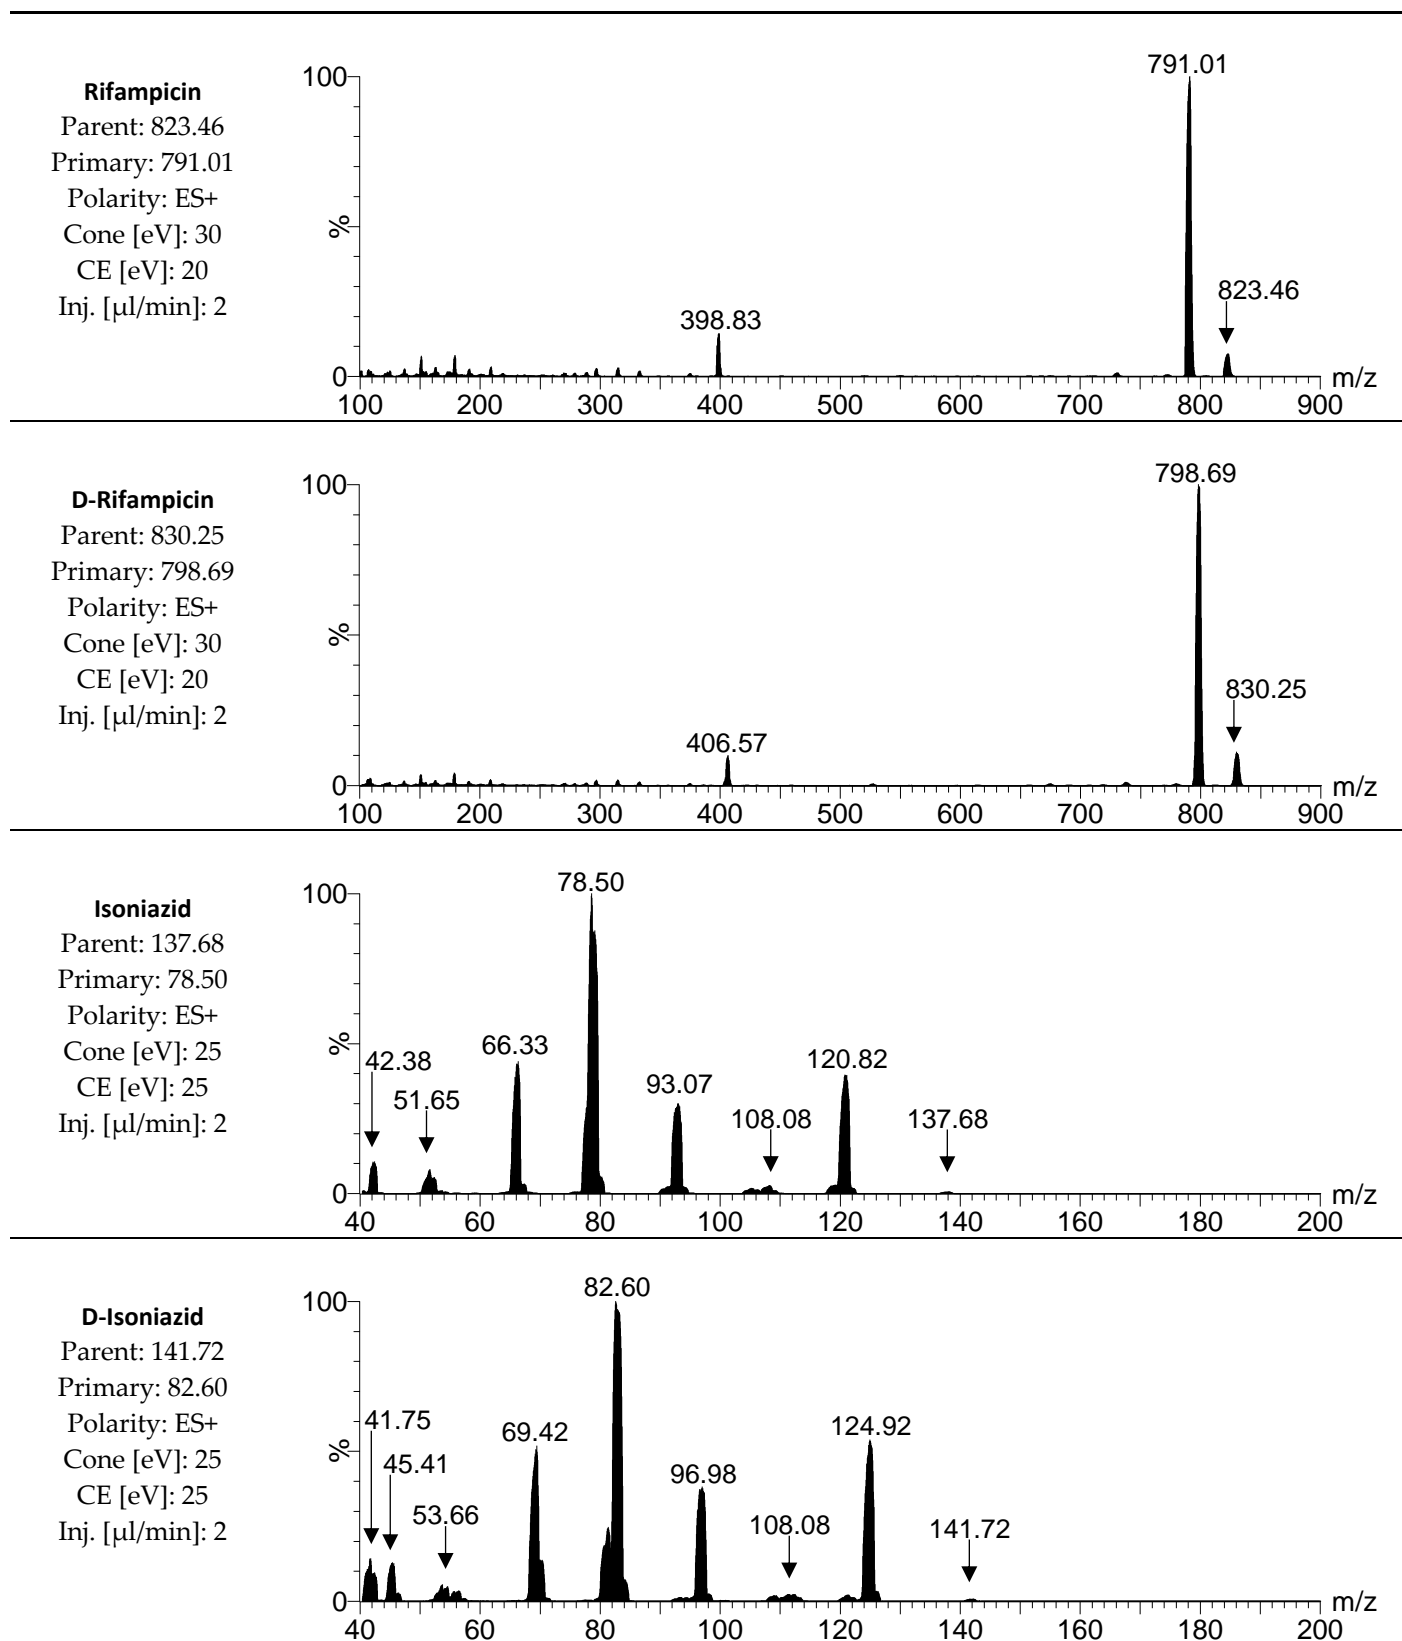

**Rifabutin**  
Parent: 847.02  
Primary: 815.52  
Polarity: ES+  
Cone [eV]: 40  
CE [eV]: 35  
Inj. [ $\mu$ l/min]: 2

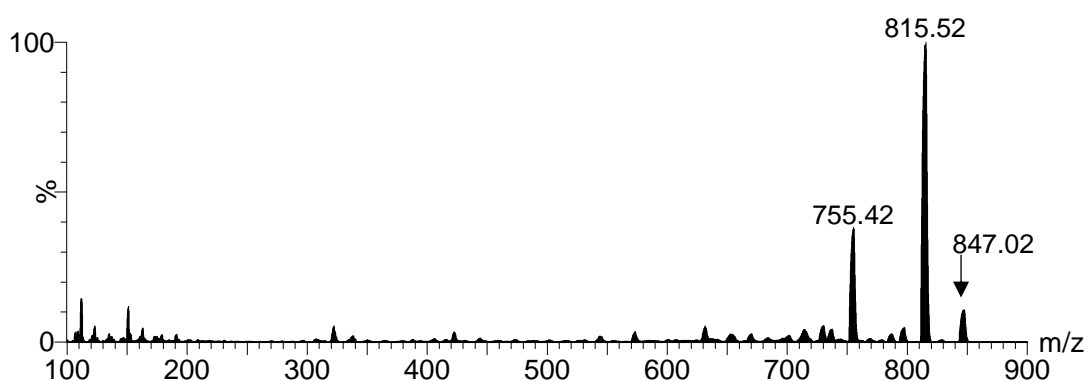

**D-Rifabutin**  
Parent: 852.59  
Primary: 821.16  
Polarity: ES+  
Cone [eV]: 40  
CE [eV]: 35  
Inj. [ $\mu$ l/min]: 2

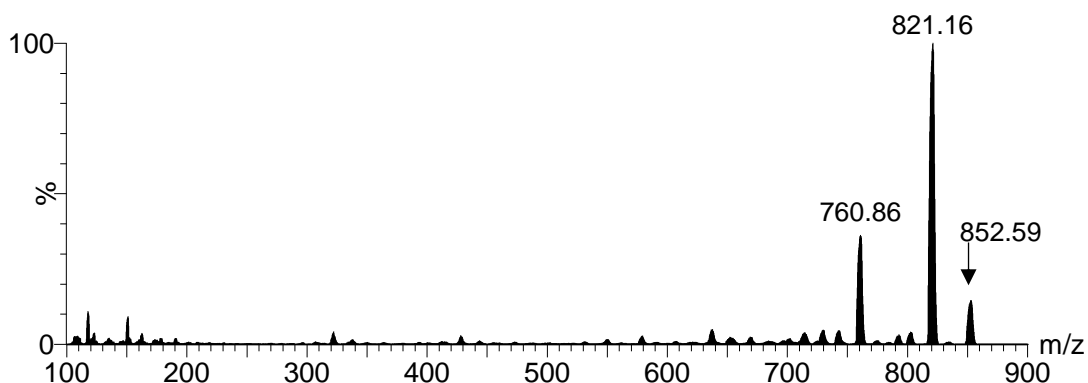

**Levofloxacin**  
Parent: 361.82  
Primary: 261.17  
Polarity: ES+  
Cone [eV]: 40  
CE [eV]: 30  
Inj. [ $\mu$ l/min]: 2

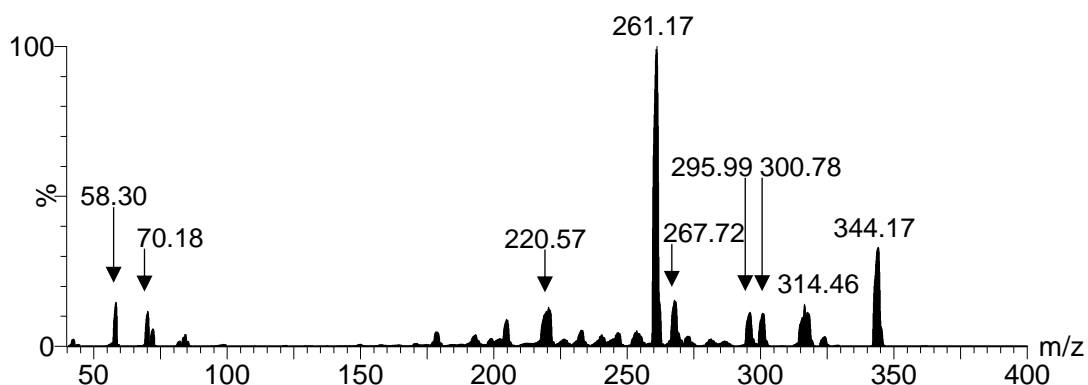

**D-Levofloxacin**  
Parent: 366.04  
Primary: 261.04  
Polarity: ES+  
Cone [eV]: 40  
CE [eV]: 30  
Inj. [ $\mu$ l/min]: 2

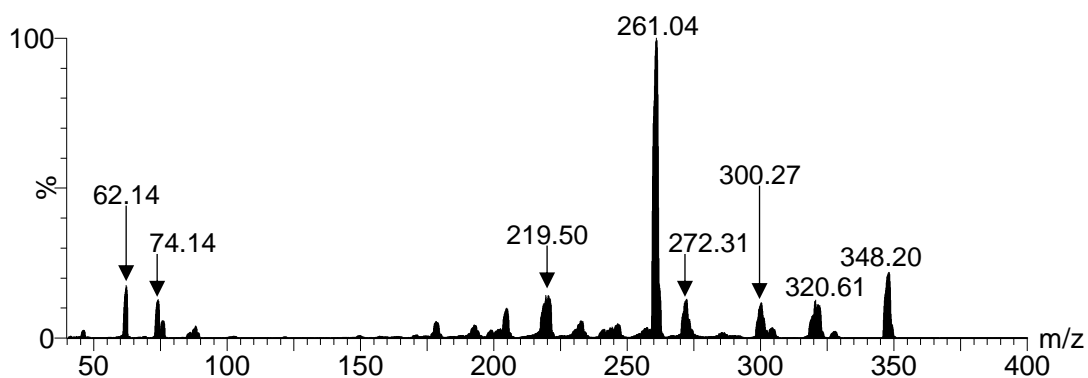

**Moxifloxacin**

Parent: 401.67  
Primary: 364.21  
Polarity: ES+  
Cone [eV]: 40  
CE [eV]: 35  
Inj. [ $\mu$ l/min]: 2

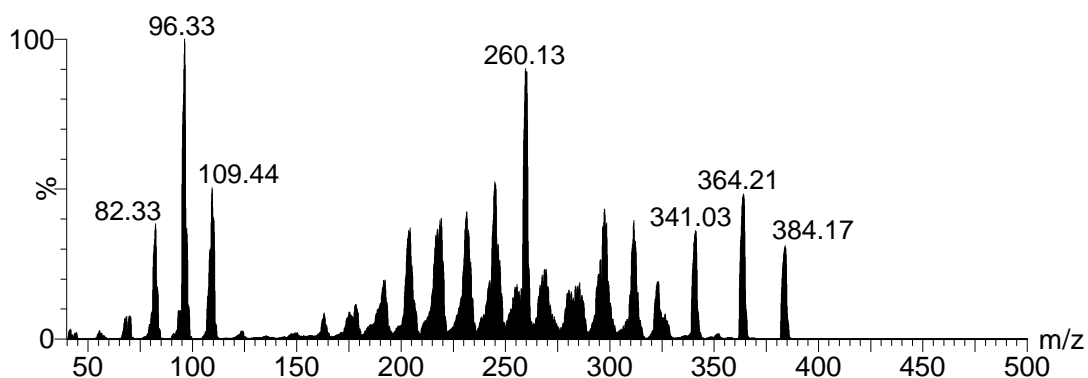**D-Moxifloxacin**

Parent: 407.30  
Primary: 369.11  
Polarity: ES+  
Cone [eV]: 40  
CE [eV]: 35  
Inj. [ $\mu$ l/min]: 2

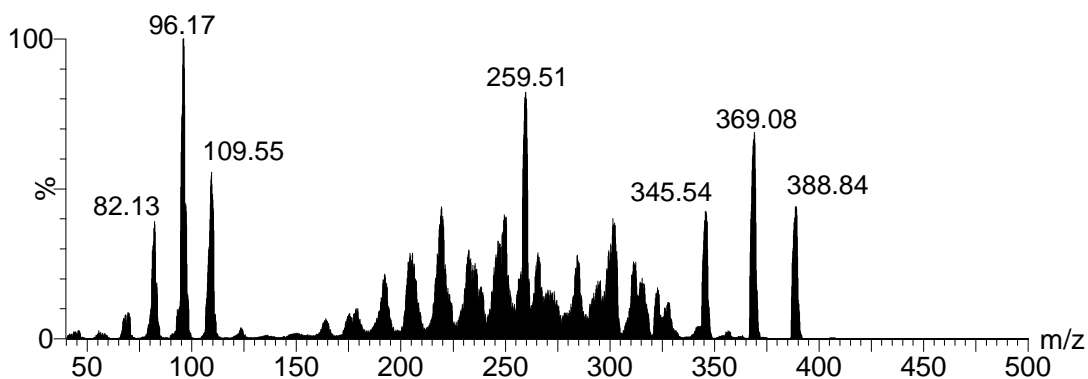**Bedaquiline**

Parent: 555.14  
Primary: 58.16  
Polarity: ES+  
Cone [eV]: 30  
CE [eV]: 35  
Inj. [ $\mu$ l/min]: 2

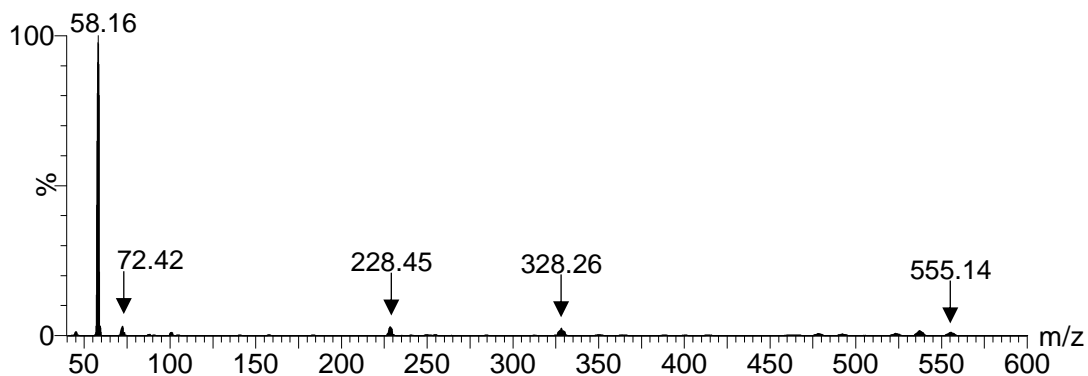**D-Bedaquiline**

Parent: 561.13  
Primary: 64.13  
Polarity: ES+  
Cone [eV]: 30  
CE [eV]: 35  
Inj. [ $\mu$ l/min]: 2

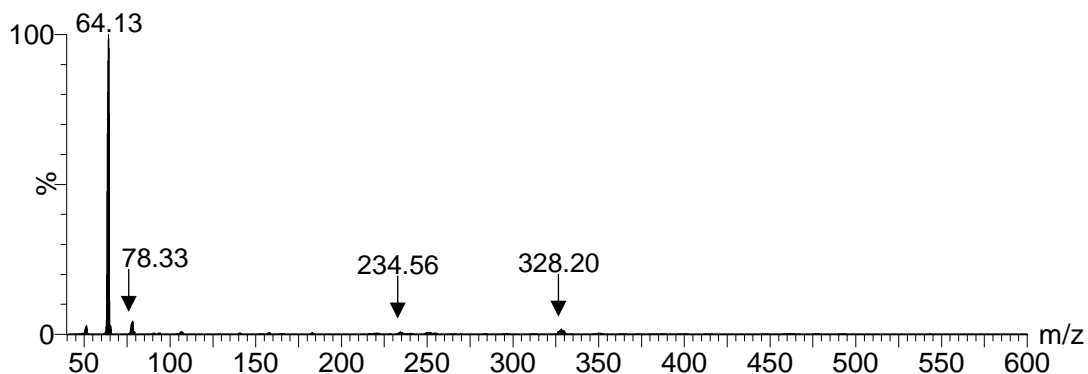

**Linezolid**  
Parent: 337.17  
Primary: 195.20  
Polarity: ES+  
Cone [eV]: 40  
CE [eV]: 25  
Inj. [ $\mu$ l/min]: 2

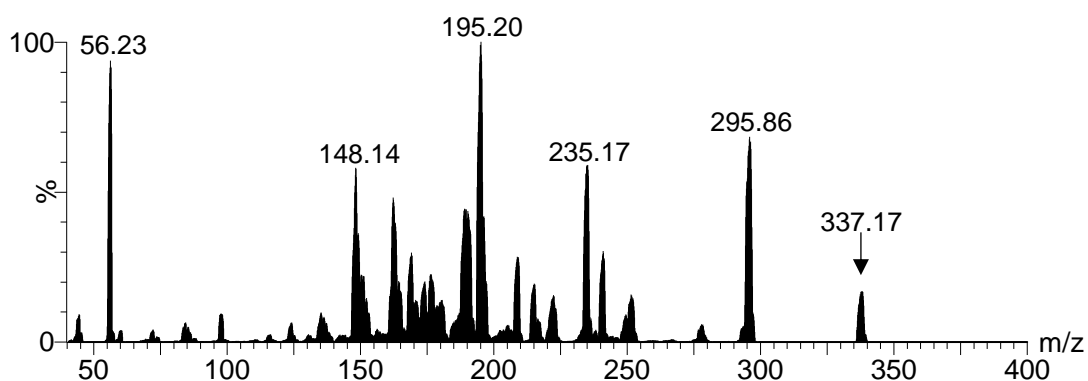

**D-Linezolid**  
Parent: 345.10  
Primary: 203.20  
Polarity: ES+  
Cone [eV]: 40  
CE [eV]: 25  
Inj. [ $\mu$ l/min]: 2

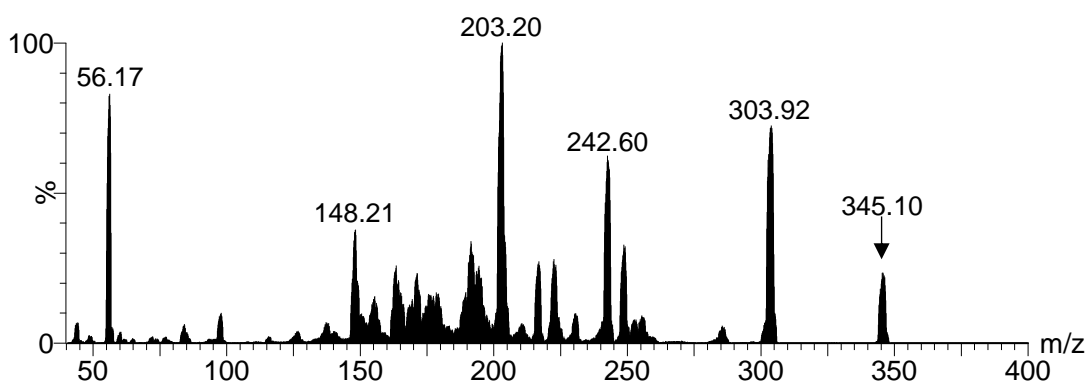

**Pretomanid**  
Parent: 359.00  
Primary: 174.82  
Polarity: ES+  
Cone [eV]: 35  
CE [eV]: 25  
Inj. [ $\mu$ l/min]: 2

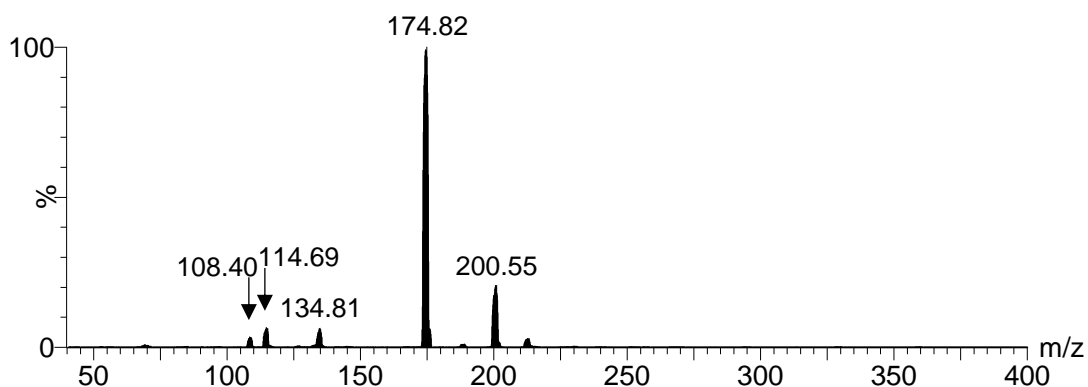

**Clofazimine**

Parent: 471.61  
Primary: 395.25  
Polarity: ES+  
Cone [eV]: 60  
CE [eV]: 45  
Inj. [ $\mu$ l/min]: 2

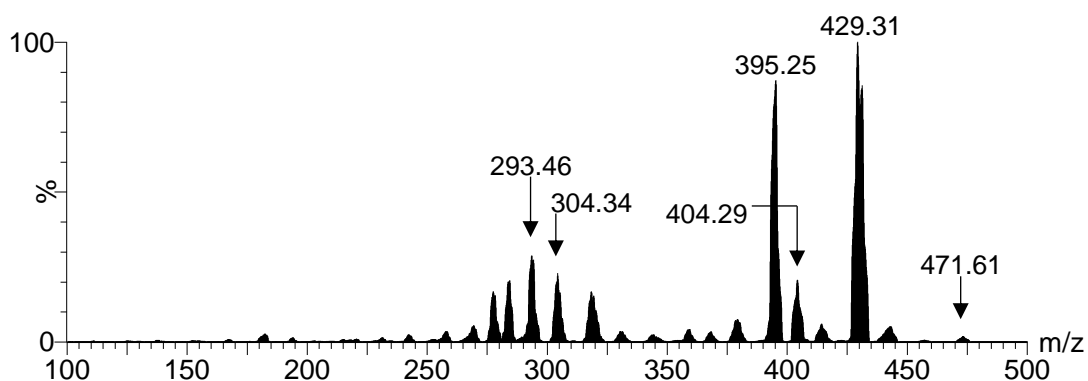**D-Clofazimine**

Parent: 480.00  
Primary: 396.15  
Polarity: ES+  
Cone [eV]: 60  
CE [eV]: 45  
Inj. [ $\mu$ l/min]: 2

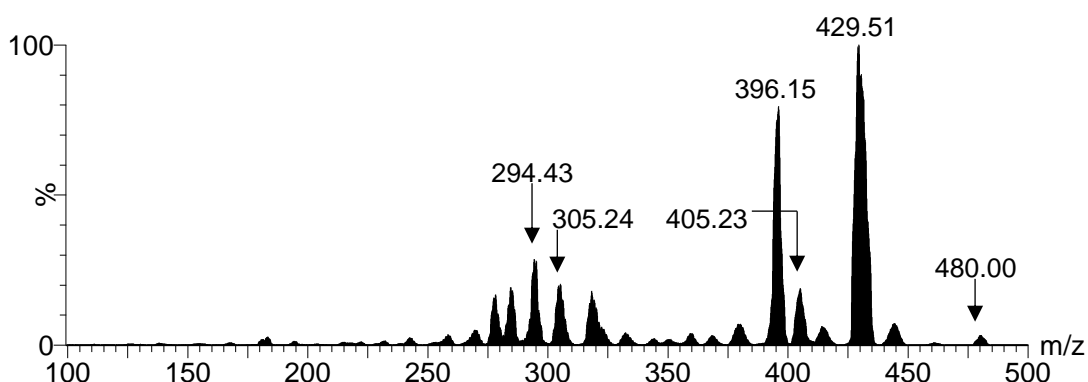**Cycloserine**

Parent: 102.88  
Primary: 75.03  
Polarity: ES+  
Cone [eV]: 25  
CE [eV]: 10  
Inj. [ $\mu$ l/min]: 2

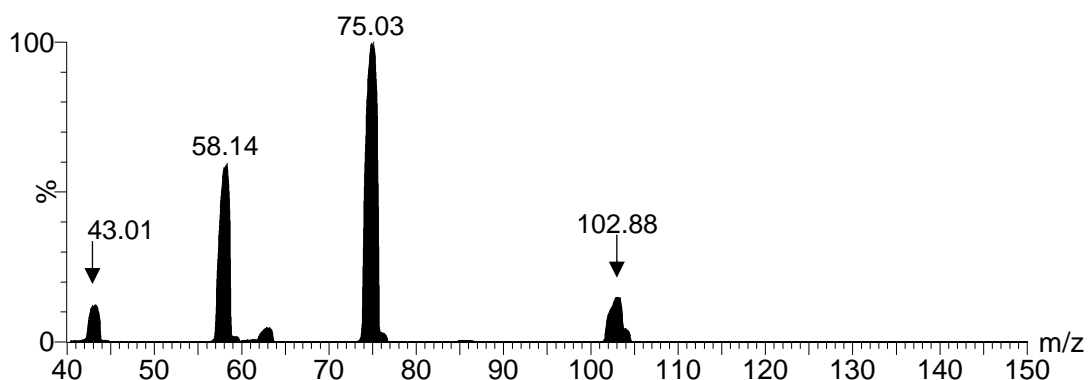**D-Cycloserine**

Parent: 106.22  
Primary: 78.85  
Polarity: ES+  
Cone [eV]: 25  
CE [eV]: 10  
Inj. [ $\mu$ l/min]: 2

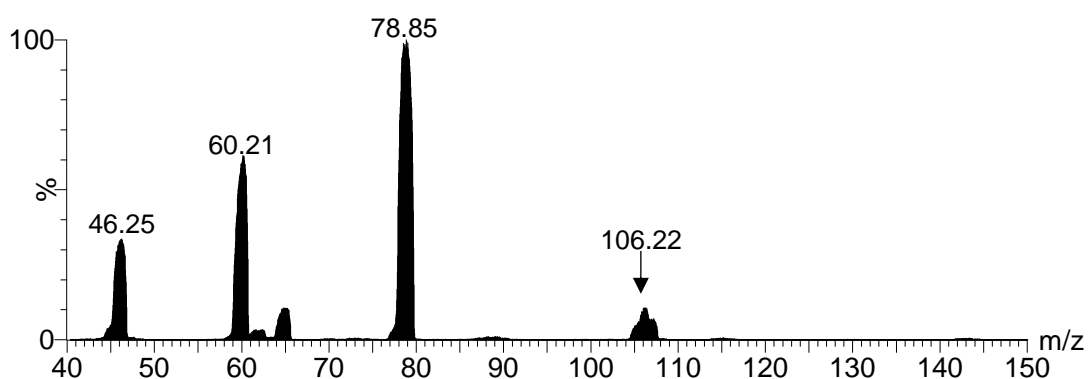

**Ethambutol**

Parent: 204.78

Primary: 44.29

Polarity: ES+

Cone [eV]: 20

CE [eV]: 25

Inj. [ $\mu$ l/min]: 2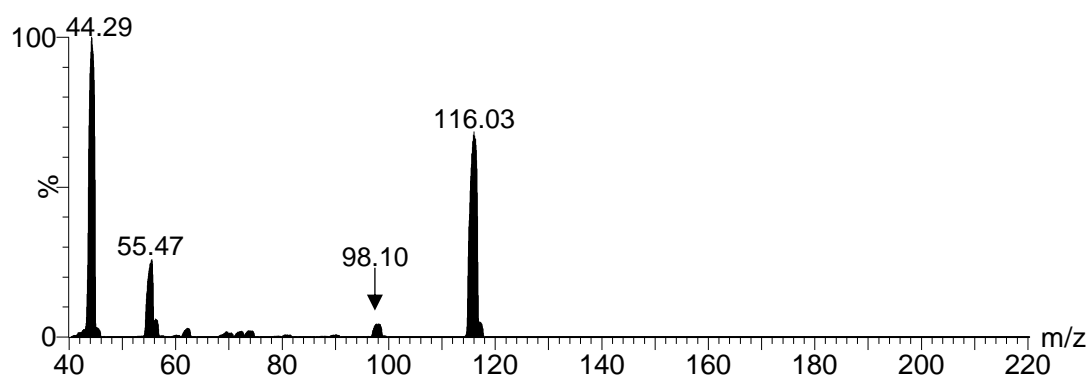**D-Ethambutol**

Parent: 208.78

Primary: 48.29

Polarity: ES+

Cone [eV]: 20

CE [eV]: 25

Inj. [ $\mu$ l/min]: 2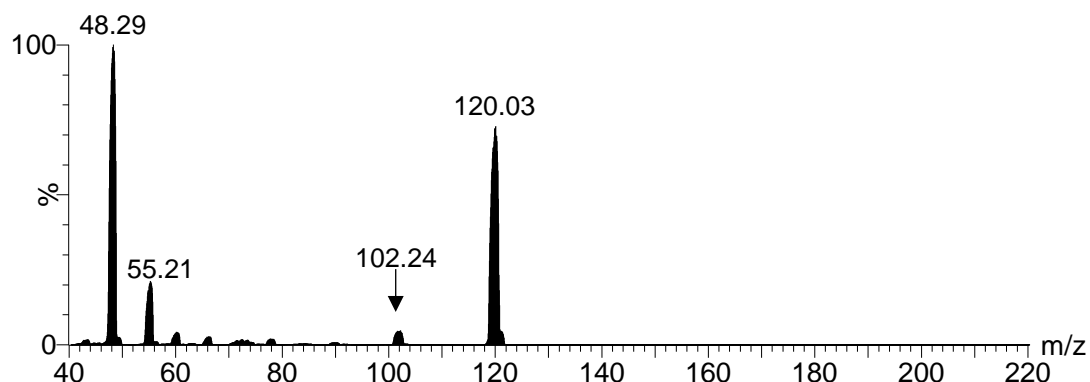**Delamanid**

Parent: 534.37

Primary: 352.07

Polarity: ES+

Cone [eV]: 35

CE [eV]: 25

Inj. [ $\mu$ l/min]: 2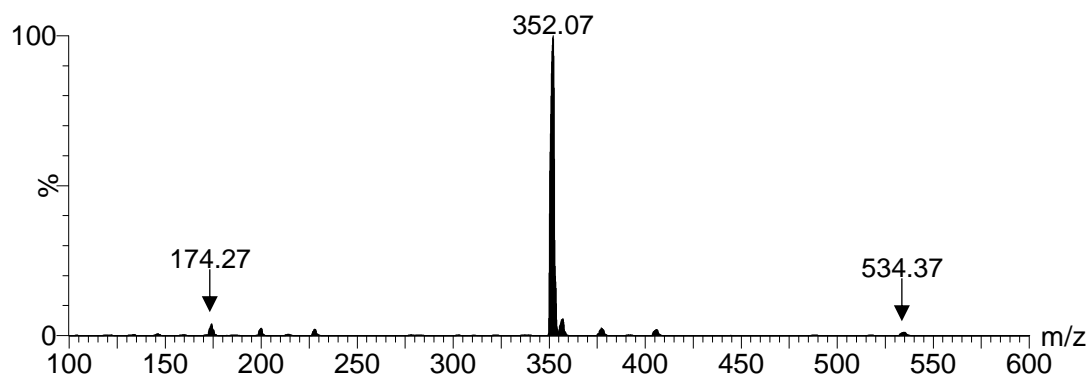**D-Delamanid**

Parent: 538.30

Primary: 356.07

Polarity: ES+

Cone [eV]: 35

CE [eV]: 25

Inj. [ $\mu$ l/min]: 2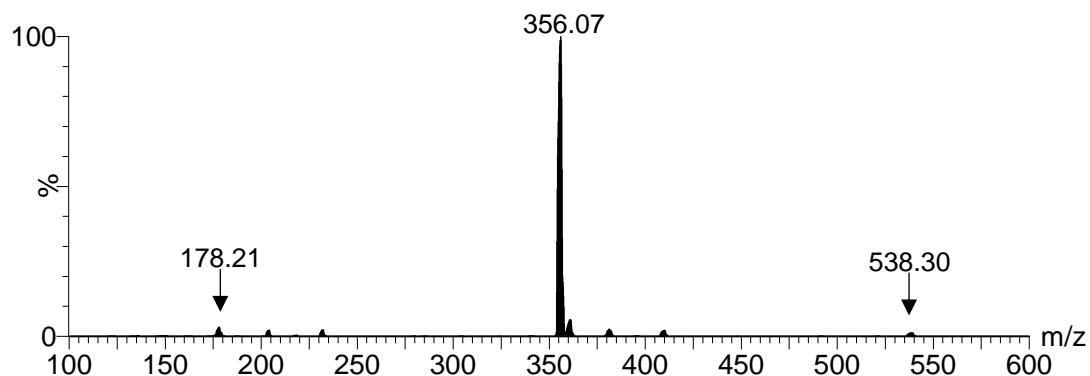

**Pyrazinamide**  
Parent: 123.68  
Primary: 78.88  
Polarity: ES+  
Cone [eV]: 20  
CE [eV]: 20  
Inj. [ $\mu$ l/min]: 10

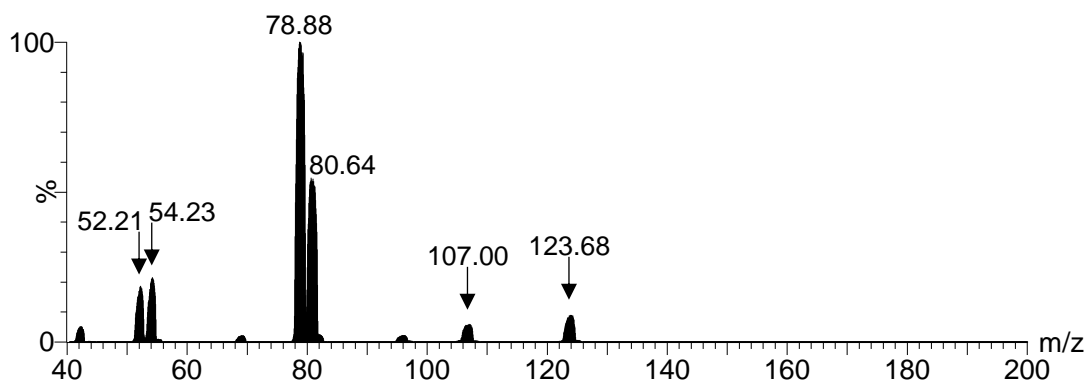

**D-Pyrazinamide**  
Parent: 127.21  
Primary: 82.85  
Polarity: ES+  
Cone [eV]: 20  
CE [eV]: 20  
Inj. [ $\mu$ l/min]: 10

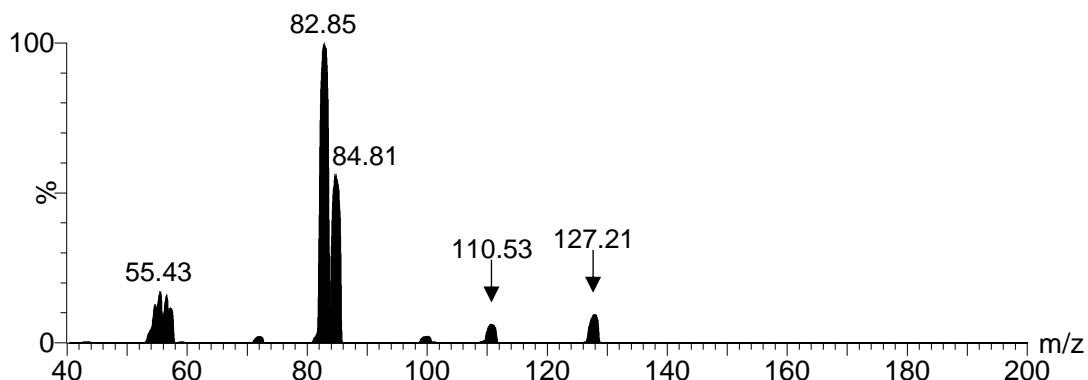

**Meropenem**  
Parent: 383.95  
Primary: 68.04  
Polarity: ES+  
Cone [eV]: 25  
CE [eV]: 25  
Inj. [ $\mu$ l/min]: 2

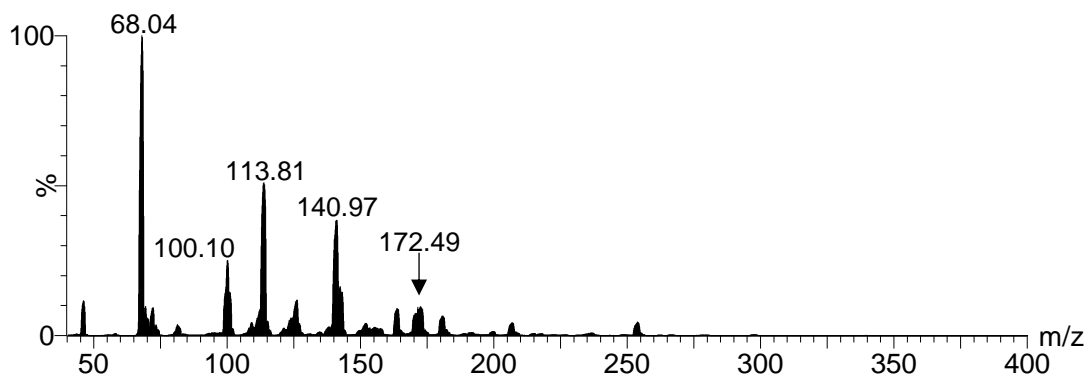

**D-Meropenem**  
Parent: 389.96  
Primary: 68.06  
Polarity: ES+  
Cone [eV]: 25  
CE [eV]: 25  
Inj. [ $\mu$ l/min]: 2

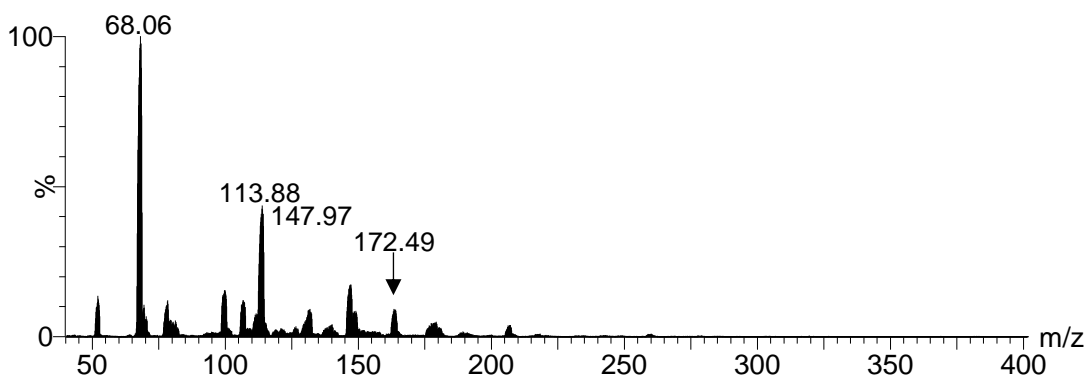

**Amikacin**  
Parent: 585.06  
Primary: 163.07  
Polarity: ES+  
Cone [eV]: 30  
CE [eV]: 30  
Inj. [ $\mu$ l/min]: 2

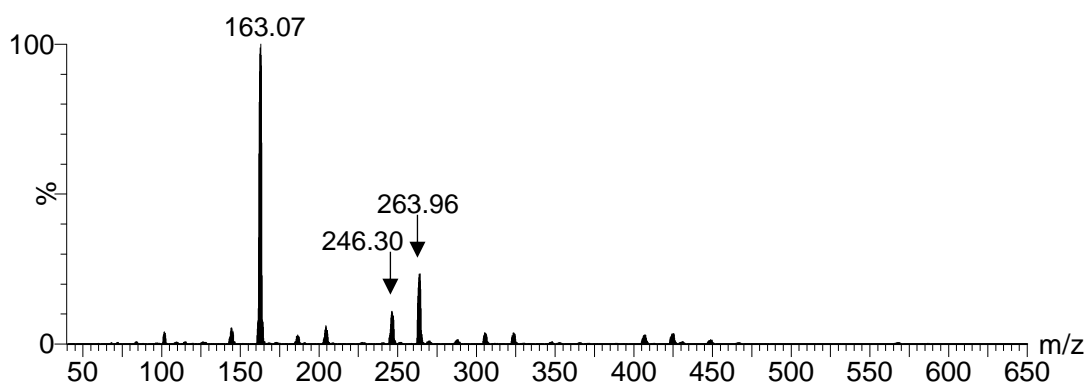

**D-Amikacin**  
Parent: 590.11  
Primary: 162.52  
Polarity: ES+  
Cone [eV]: 30  
CE [eV]: 30  
Inj. [ $\mu$ l/min]: 10

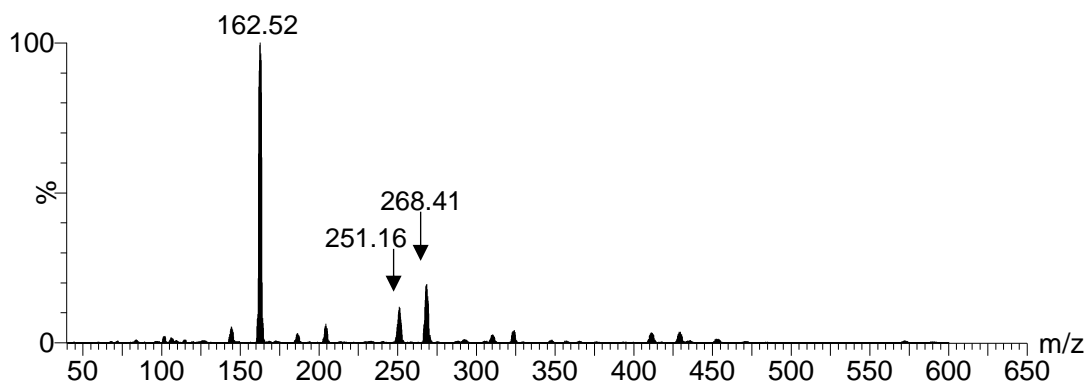

**Streptomycin**  
Parent: 582.03  
Primary: 263.10  
Polarity: ES+  
Cone [eV]: 65  
CE [eV]: 35  
Inj. [ $\mu$ l/min]: 2

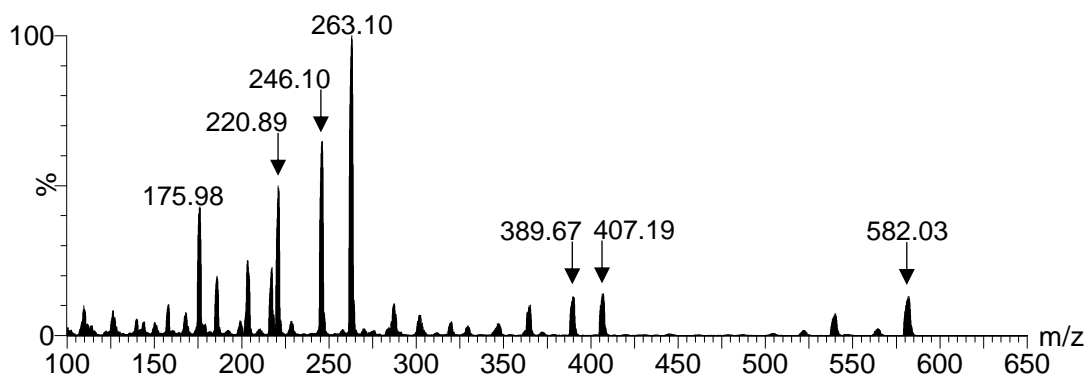



**Prothionamide**

Parent: 180.57  
Primary: 120.94  
Polarity: ES+  
Cone [eV]: 35  
CE [eV]: 25  
Inj. [ $\mu$ l/min]: 2

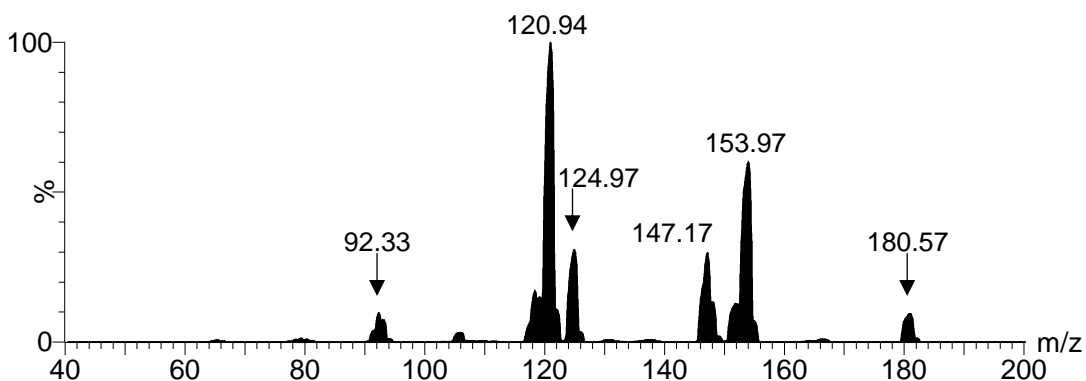**D-Prothionamide**

Parent: 187.58  
Primary: 127.21  
Polarity: ES+  
Cone [eV]: 35  
CE [eV]: 25  
Inj. [ $\mu$ l/min]: 2

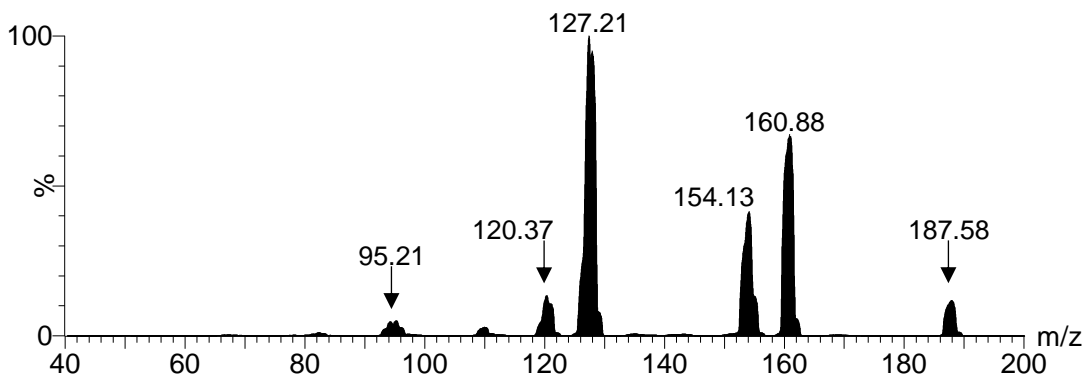**PAS**

Parent: 153.64  
Primary: 91.17  
Polarity: ES+  
Cone [eV]: 25  
CE [eV]: 25  
Inj. [ $\mu$ l/min]: 2

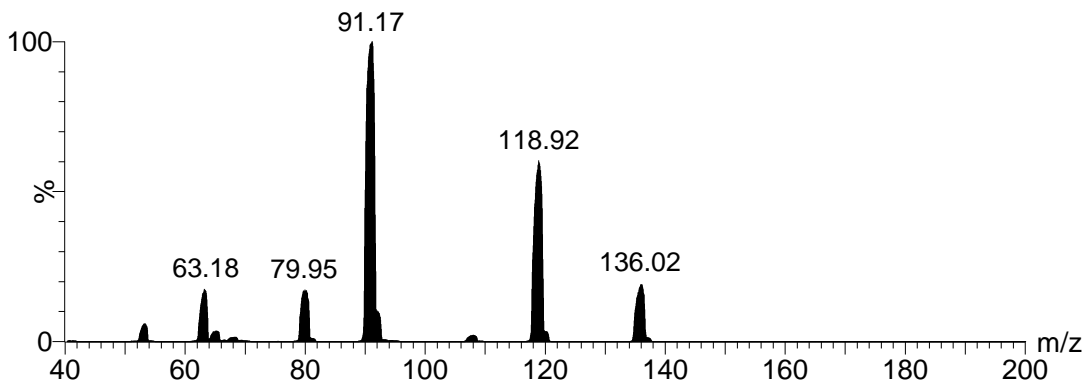**D-PAS**

Parent: 159.94  
Primary: 96.09  
Polarity: ES+  
Cone [eV]: 25  
CE [eV]: 25  
Inj. [ $\mu$ l/min]: 2

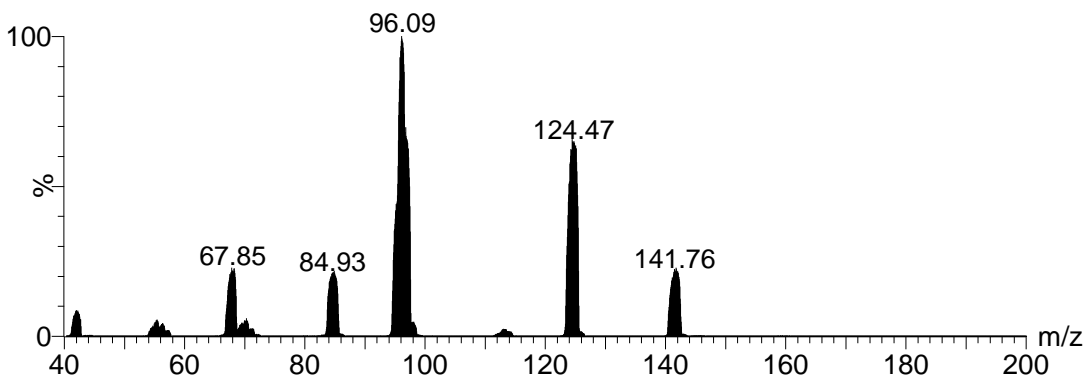

**Capreomycin IA**

Parent: 334.27

Primary: 70.24

Polarity: ES+

Cone [eV]: 25

CE [eV]: 20

Inj. [ $\mu$ l/min]: 5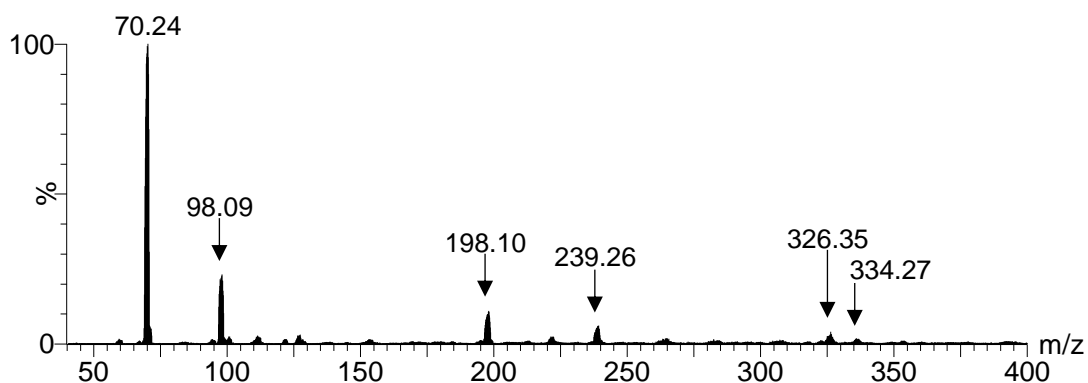**Capreomycin IB**

Parent: 326.21

Primary: 70.18

Polarity: ES+

Cone [eV]: 25

CE [eV]: 20

Inj. [ $\mu$ l/min]: 5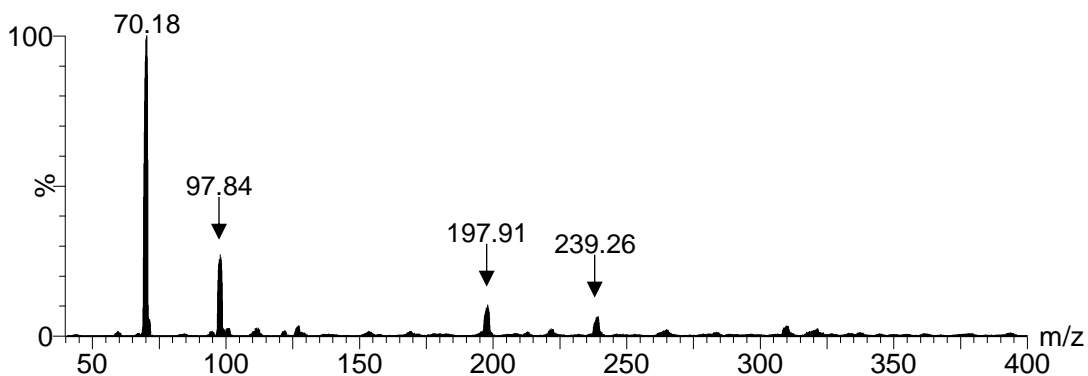**Kanamycin**

Parent: 484.46

Primary: 162.48

Polarity: ES+

Cone [eV]: 35

CE [eV]: 25

Inj. [ $\mu$ l/min]: 2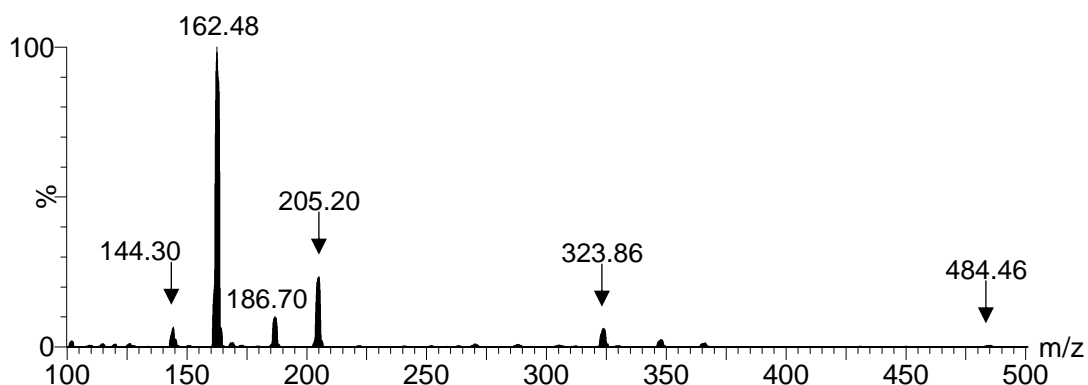**D-Kanamycin**

Parent: 491.52

Primary: 162.52

Polarity: ES+

Cone [eV]: 25

CE [eV]: 25

Inj. [ $\mu$ l/min]: 2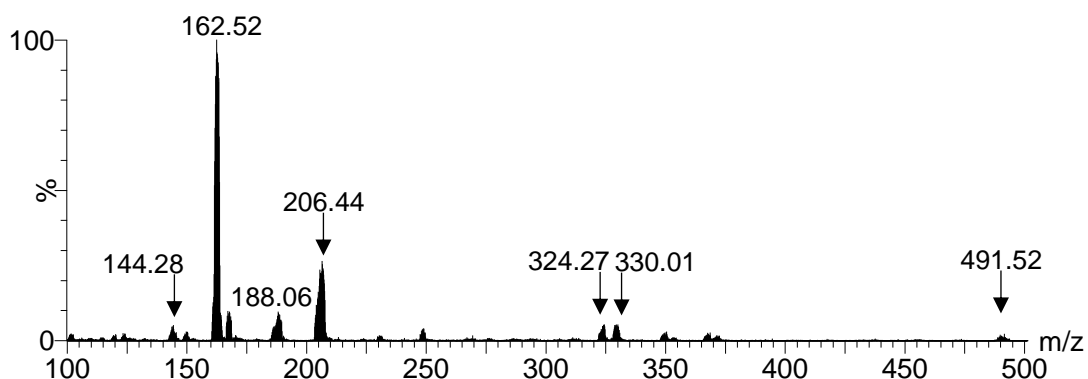

**Gentamicin**  
Parent: 477.43  
Primary: 157.15  
Polarity: ES+  
Cone [eV]: 30  
CE [eV]: 20  
Inj. [ $\mu\text{l}/\text{min}$ ]: 10

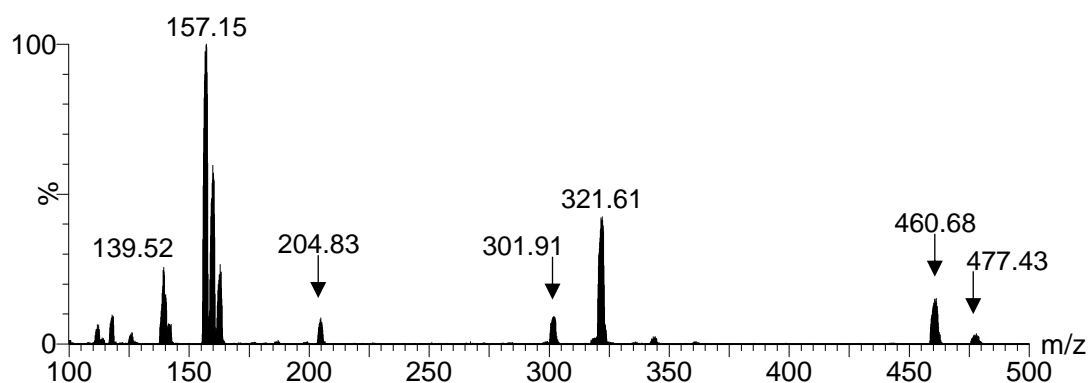

Parent/primary: mass to charge ratio of an ionized molecule before (parent) and after (daughter, highest response: primary daughter) fragmentation in the collision cell of a triple quadrupole mass spectrometer; ES+/ES-: positive/negative ion mode, ionisation by adding positively charged protons/negatively charged electrons; cone: cone voltage; CE: collision energy; eV: electron volt; inj.: injection volume; m/z: mass to charge ratio.

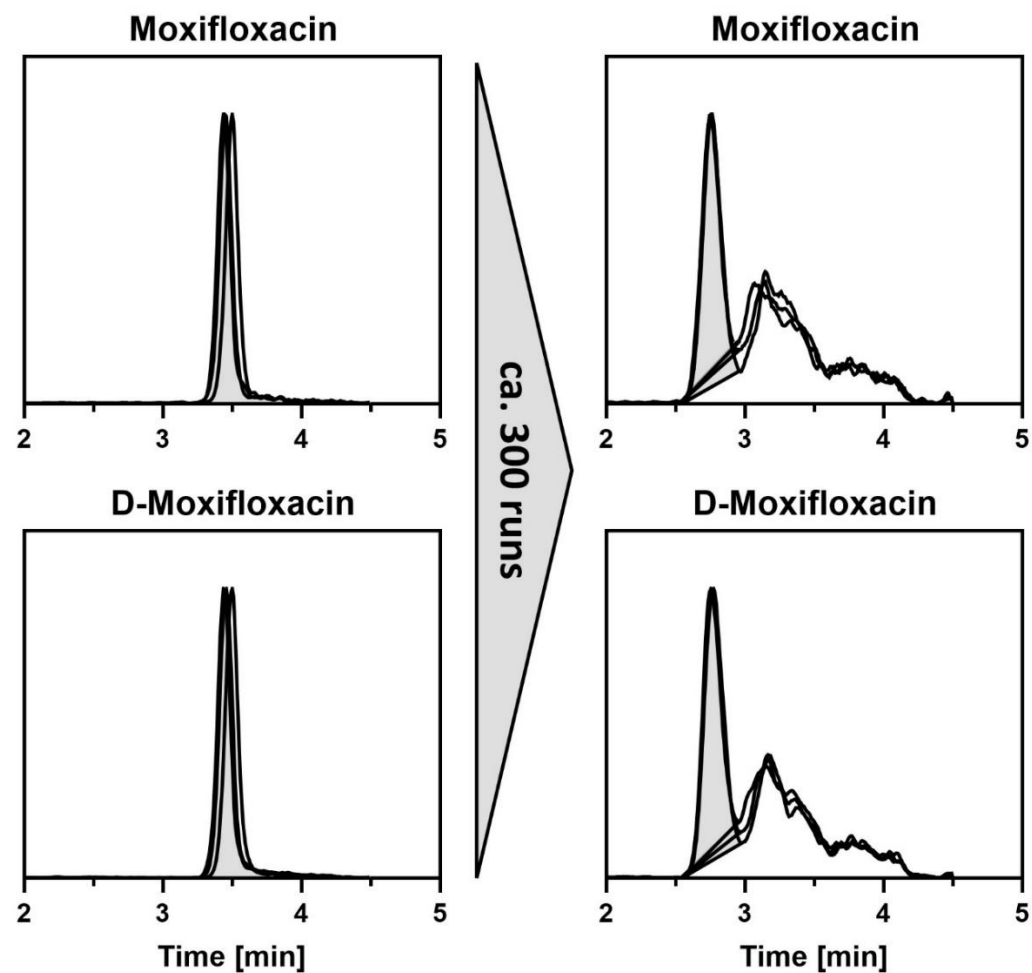

**Figure S2. Peak tailing of moxifloxacin and D-moxifloxacin.** Our column showed a fast ageing process, especially manifesting in moxifloxacin: 300 injections of matrix samples lead to a moxifloxacin peak shift of 45 seconds and considerable peak tailing. Deuterated moxifloxacin (D-moxifloxacin) as internal standard for moxifloxacin behaved identically and could compensate for the effect.

Table S8. Calibration curves.

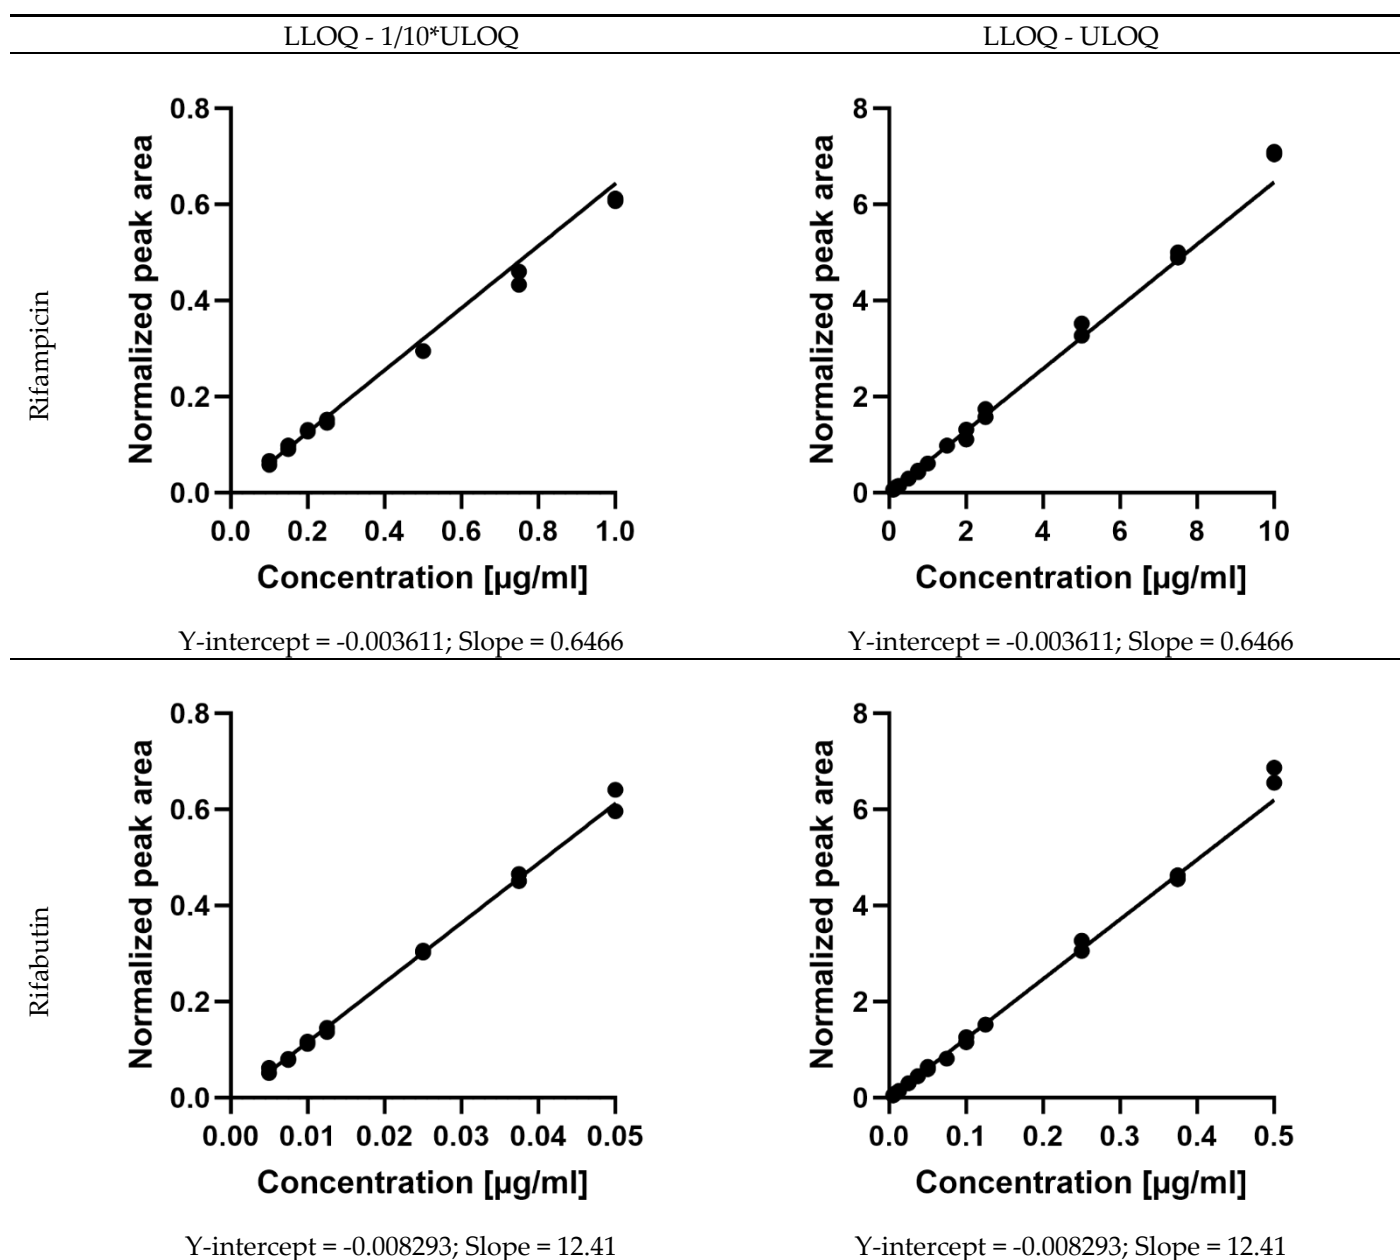

Isoniazid

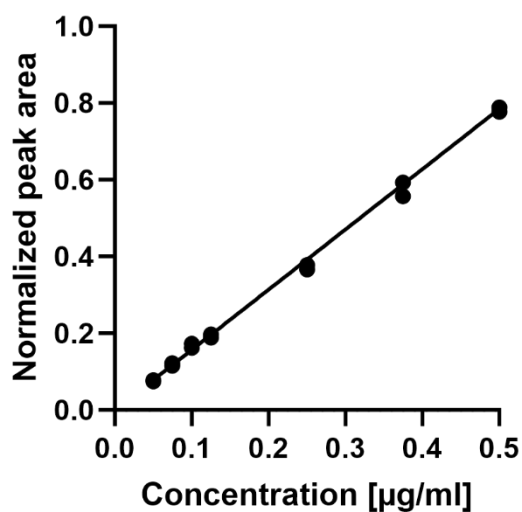

Y-intercept = -0.0001466; Slope = 1.569

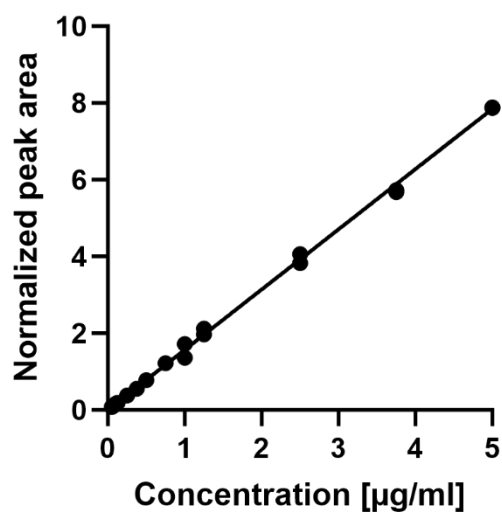

Y-intercept = -0.0001466; Slope = 1.569

Levofloxacin

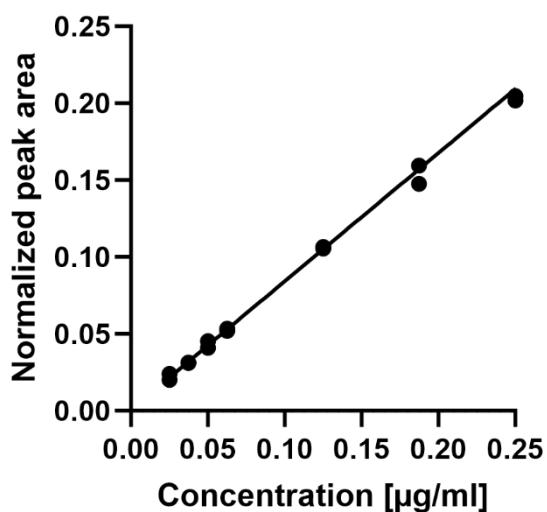

Y-intercept = 0.0008272; Slope = 0.8340

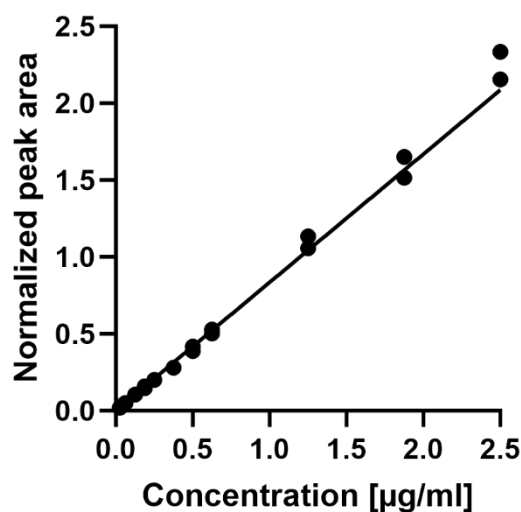

Y-intercept = 0.0008272; Slope = 0.8340

Moxifloxacin

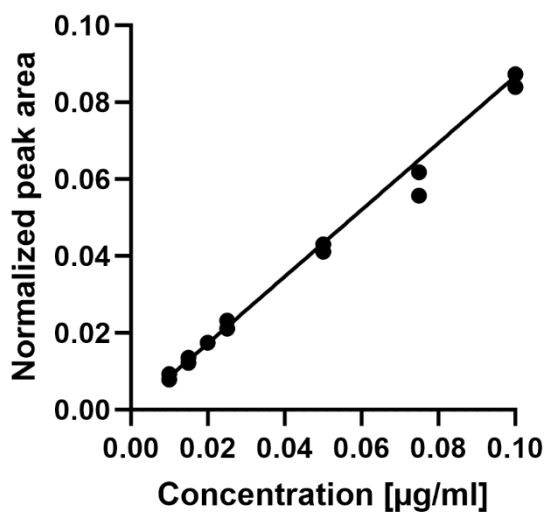

Y-intercept = -0.00009444; Slope = 0.8682

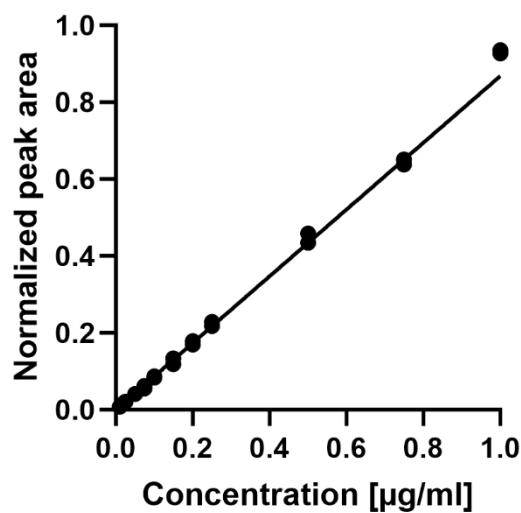

Y-intercept = -0.00009444; Slope = 0.8682

Bedaquiline

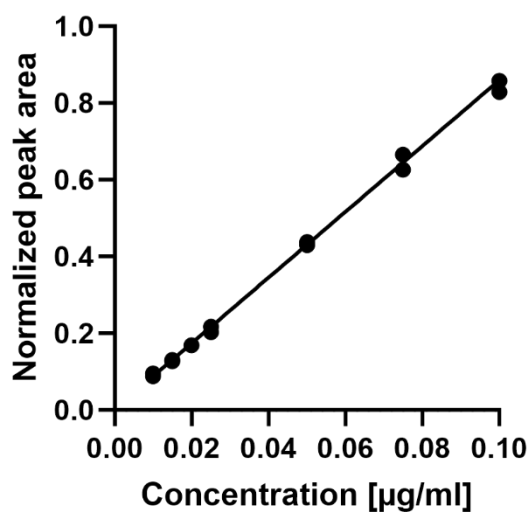

Y-intercept = 0.002452; Slope = 8.568

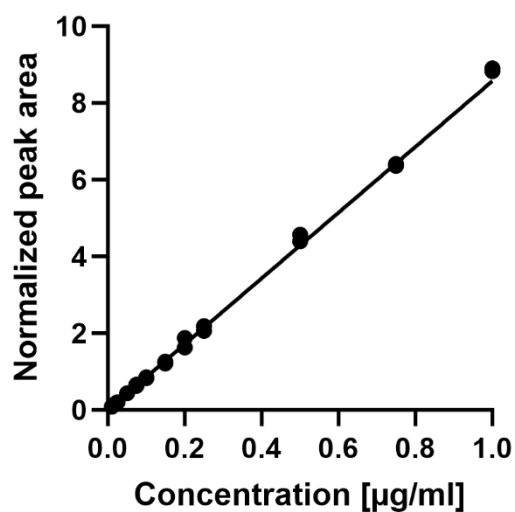

Y-intercept = 0.002452; Slope = 8.568

Linezolid

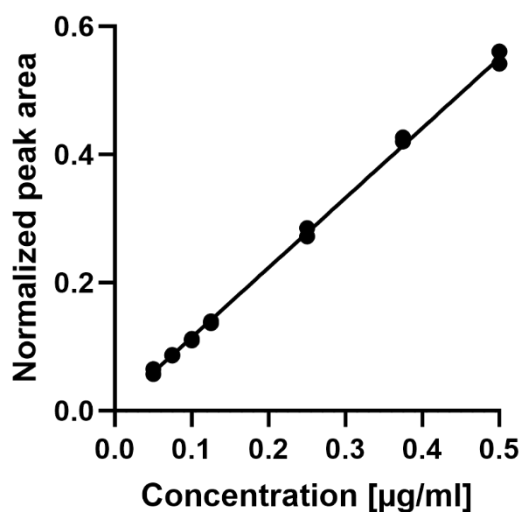

Y-intercept = 0,005359; Slope = 1,090

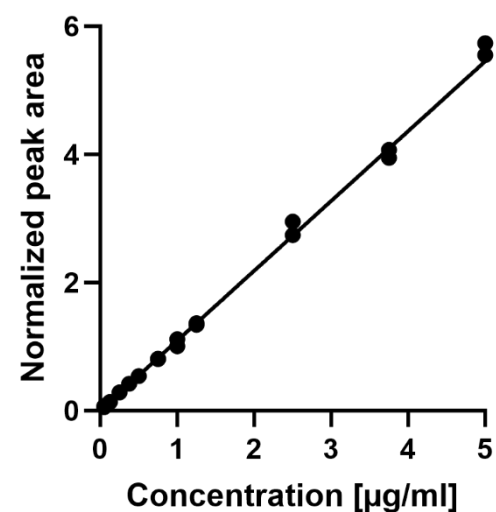

Y-intercept = 0.001363; Slope = 1.099

Pretomanid\*

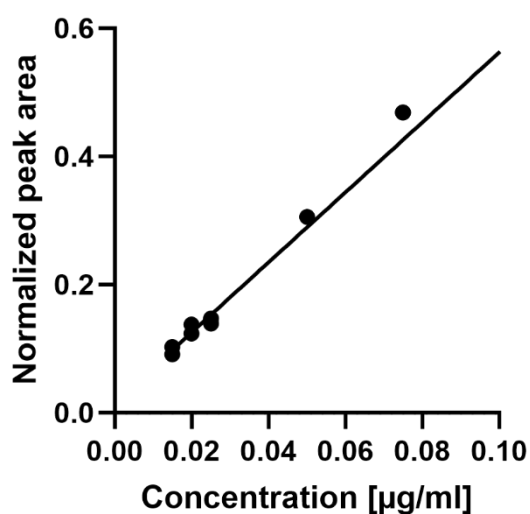

Y-intercept = 0.01636; Slope = 5.462

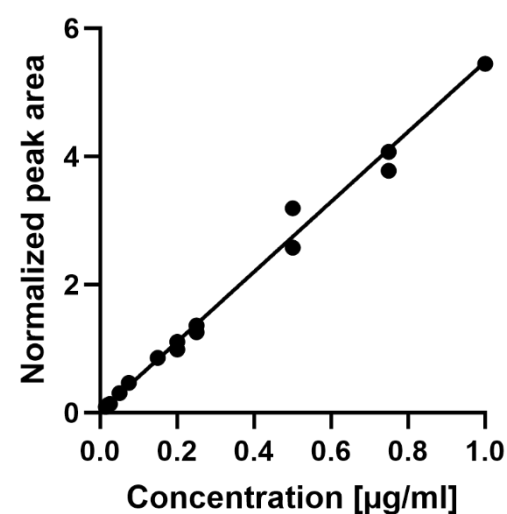

Y-intercept = 0.01636; Slope = 5.462

Clofazimine

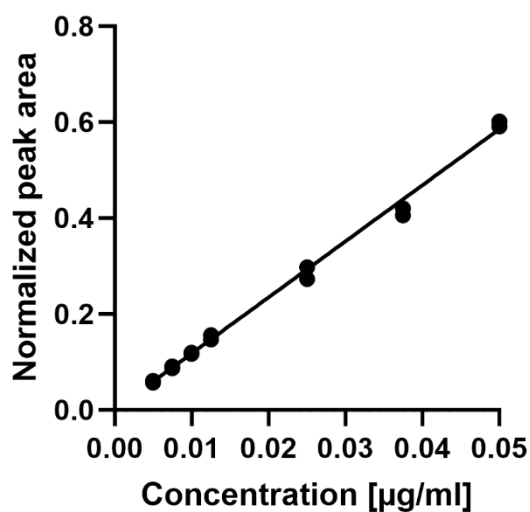

Y-intercept = 0.001363; Slope = 1.099

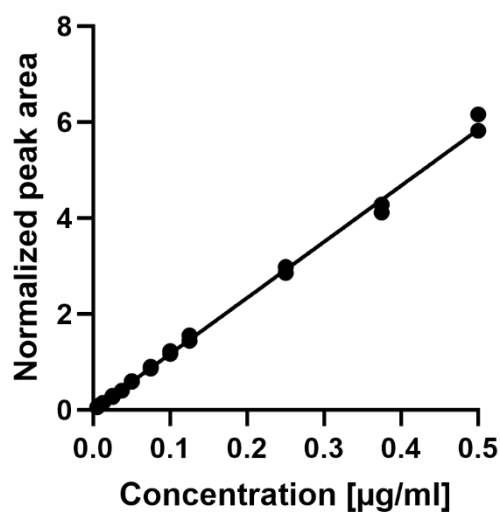

Y-intercept = 0.001363; Slope = 1.099

Cycloserine

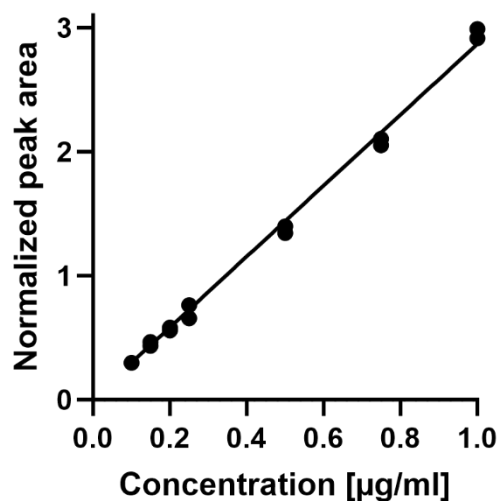

Y-intercept = 0.001147; Slope = 11.68

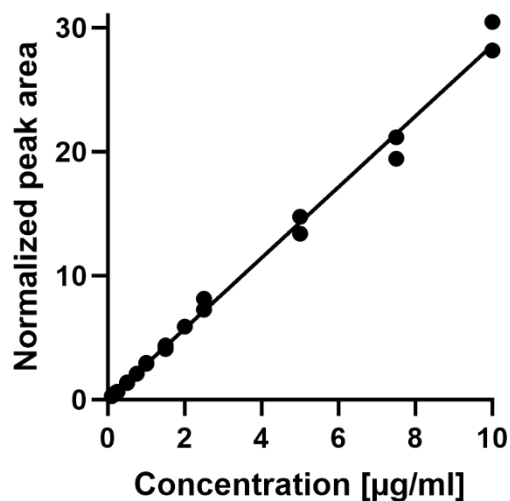

Y-intercept = 0.001147; Slope = 11.68

Ethambutol

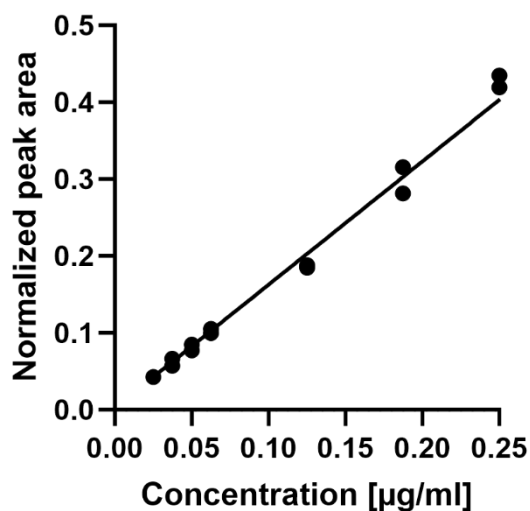

Y-intercept = -0.002435; Slope = 1.622

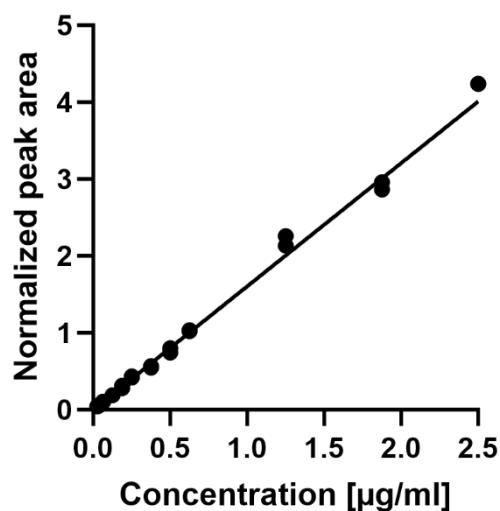

Y-intercept = -0.002435; Slope = 1.622



Delamanid

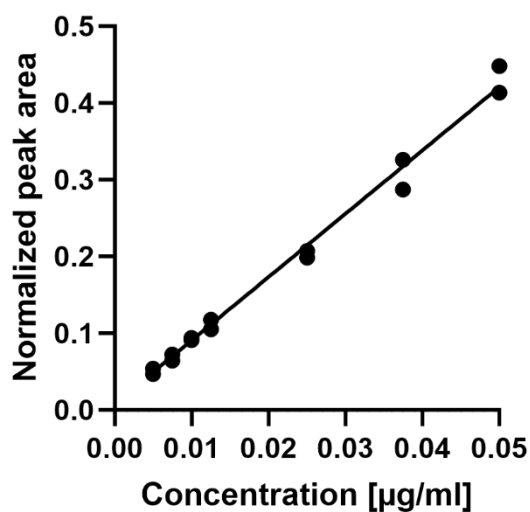

Y-intercept = 0.008393; Slope = 8.245

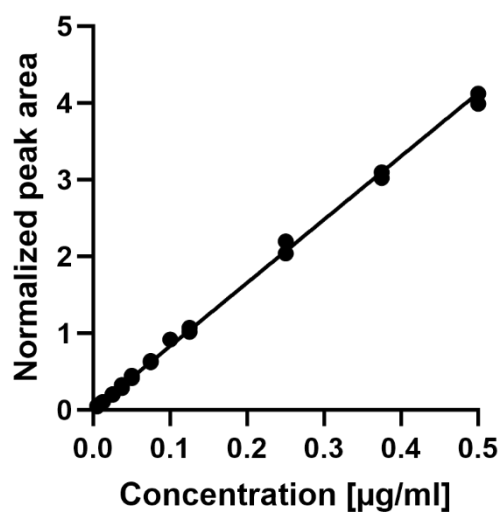

Y-intercept = 0.008393; Slope = 8.245

Pyrazinamide

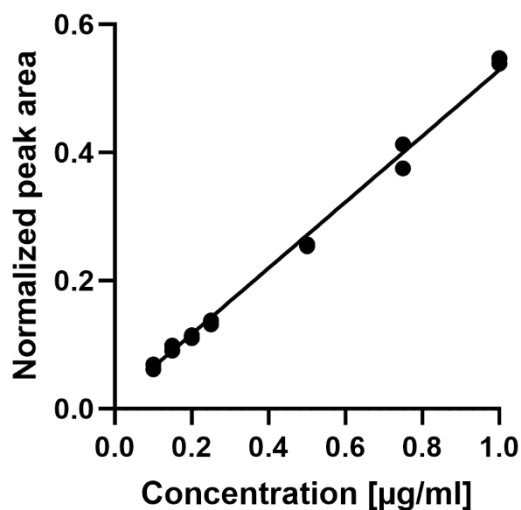

Y-intercept = 0.01331; Slope = 0.5154

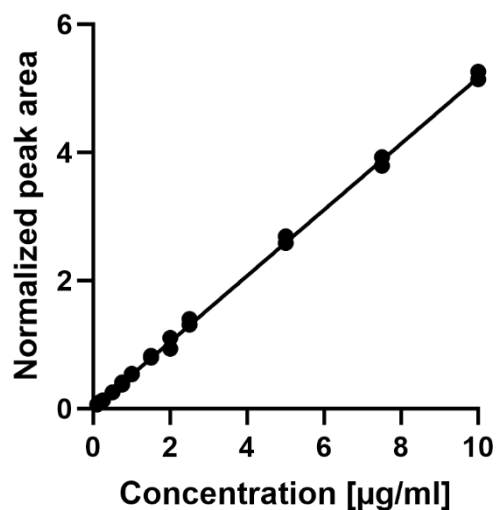

Y-intercept = 0.01331; Slope = 0.5154

Meropenem

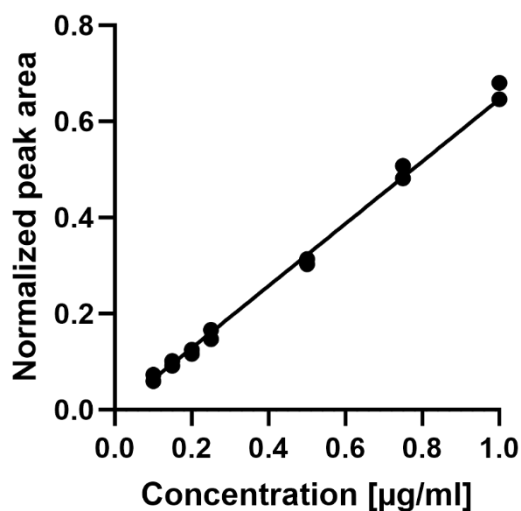

Y-intercept = 0.003047; Slope = 0.01174

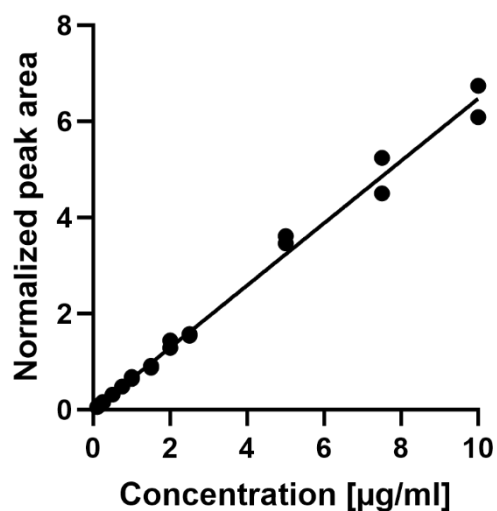

Y-intercept = 0.003047; Slope = 0.01174

Amikacin

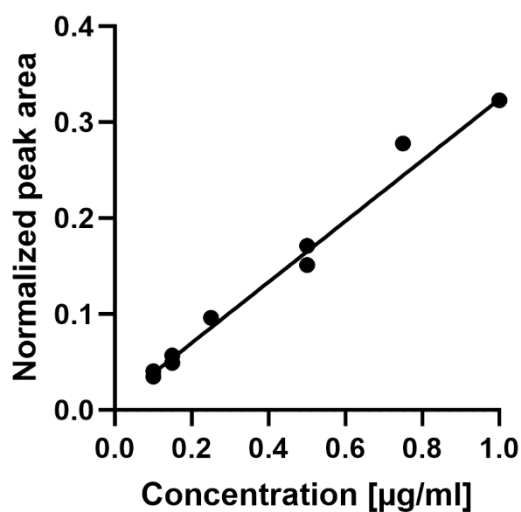

Y-intercept = 0.006386; Slope = 0.3174

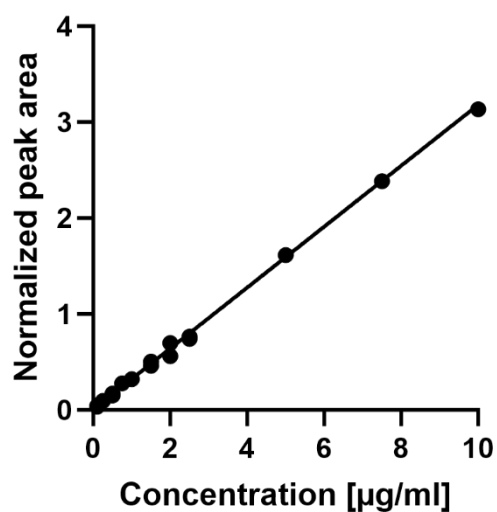

Y-intercept = 0.006386; Slope = 0.3174

Streptomycin<sup>s</sup>

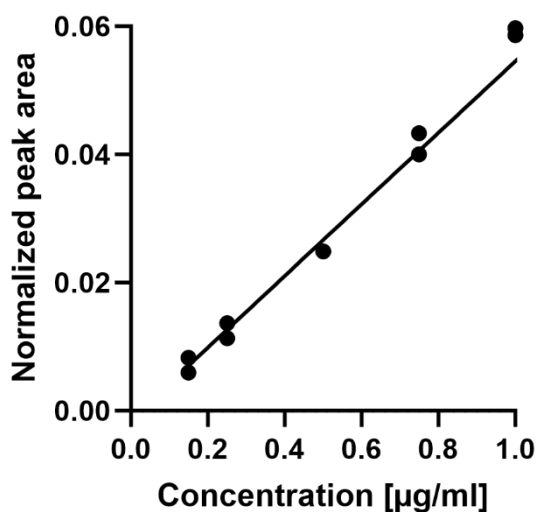

Y-intercept = -0.001298; Slope = 0.05585

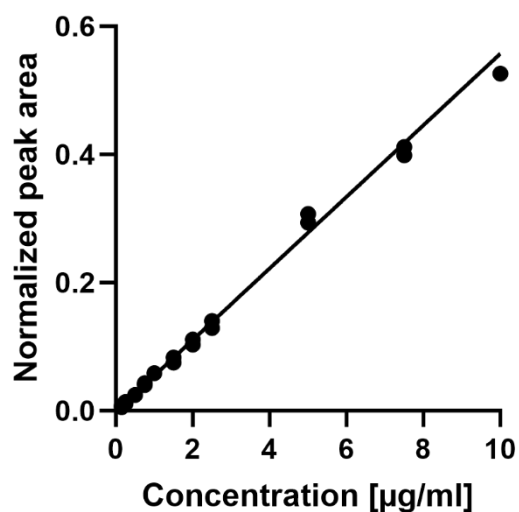

Y-intercept = -0.001298; Slope = 0.05585

Prothionamide

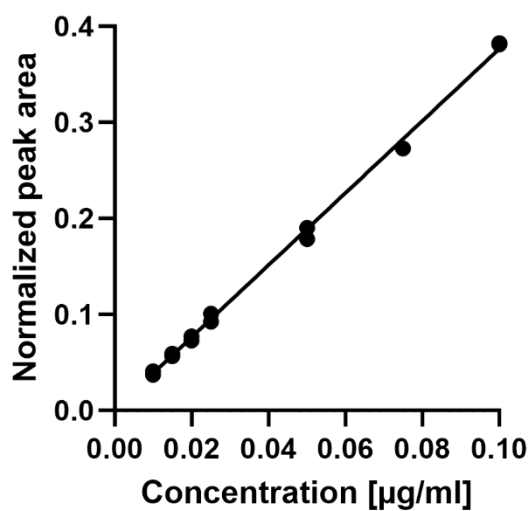

Y-intercept = 0.001311; Slope = 3.752

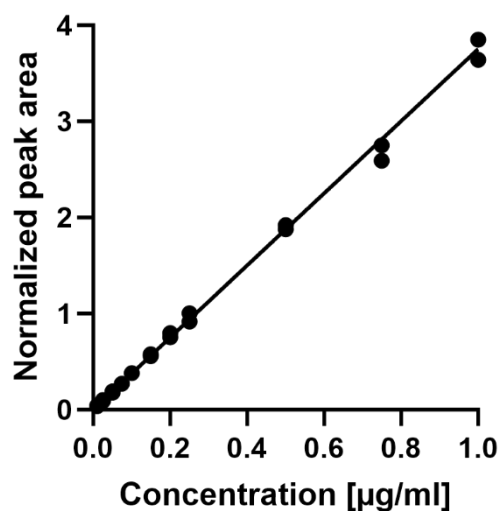

Y-intercept = 0.001311; Slope = 3.752

PAS

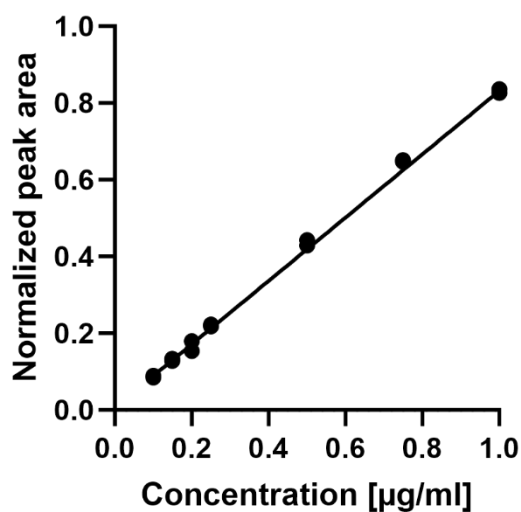

Y-intercept = 0.006192; Slope = 0.8252

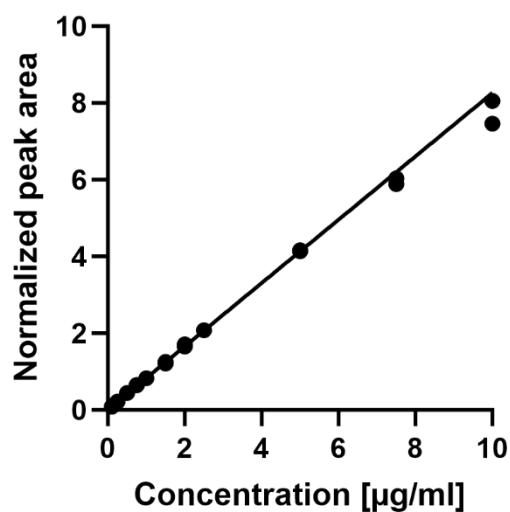

Y-intercept = 0.006192; Slope = 0.8252

Capreomycin IB<sup>s</sup>

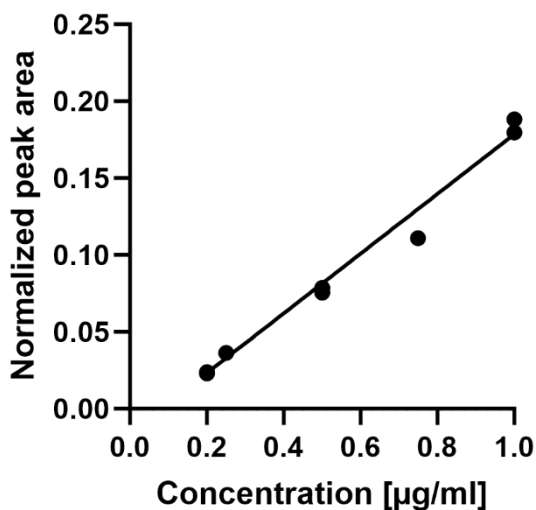

Y-intercept = -0.01564; Slope = 0.1942

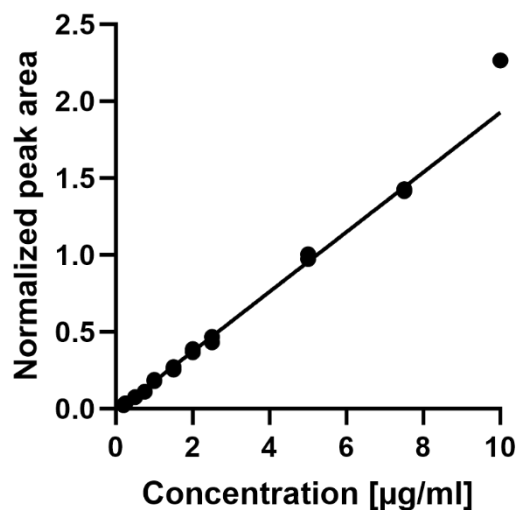

Y-intercept = -0.01564; Slope = 0.1942

Capreomycin IA<sup>s</sup>

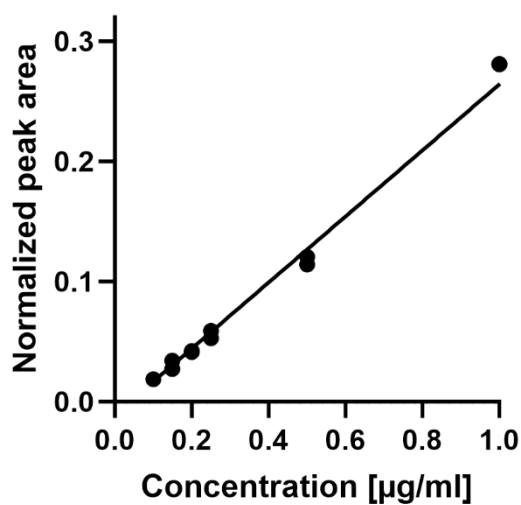

Y-intercept = -0.01073; Slope = 0.2749

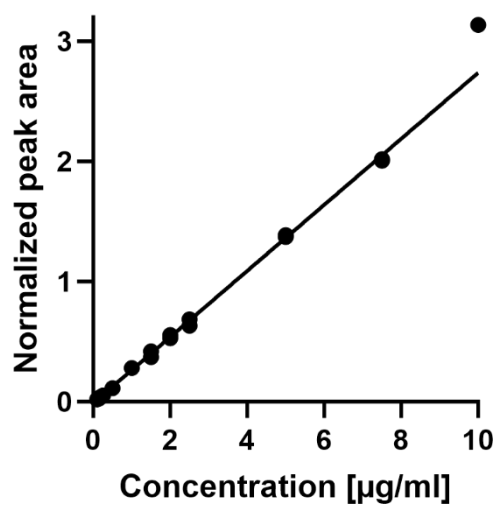

Y-intercept = -0.01073; Slope = 0.2749

Kanamycin

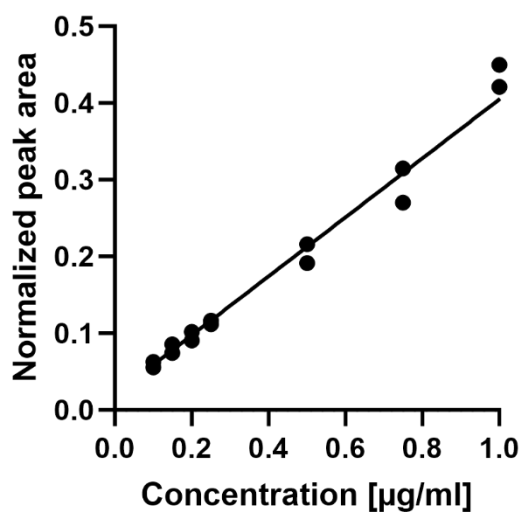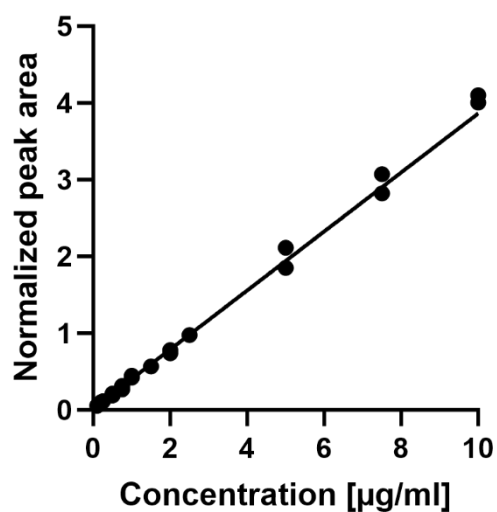

X<sup>2</sup>-weighted calibration curves of each analyte. Calibrators at 1, 0.75, 0.5, 0.25, 0.2, 0.15, 0.1, 0.075, 0.05, 0.025, 0.02, 0.015, and 0.01\*ULOQ<sub>target</sub> were used and plotted in the range of LLOQ - 1/10\*ULOQ<sub>target</sub> (left) and LLOQ - ULOQ<sub>target</sub> (right). ULOQ<sub>target</sub>: targeted upper limit of quantification; LLOQ: lower limit of quantification; \* normalised to D-delamanid; § normalised to gentamicin.

First-line drugs

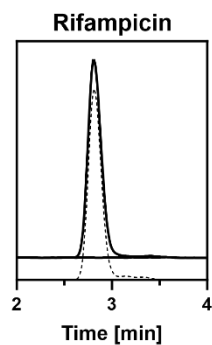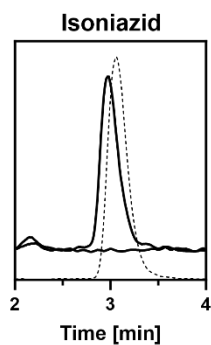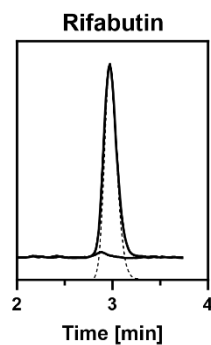

WHO group A

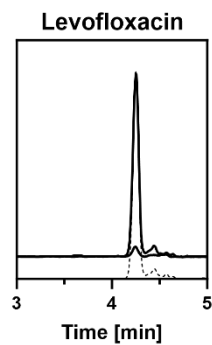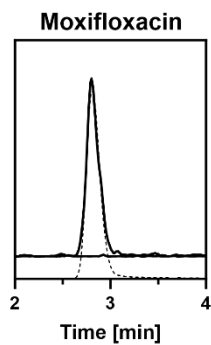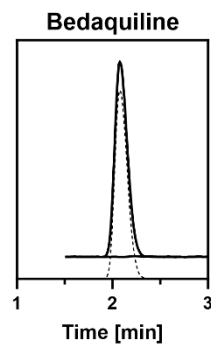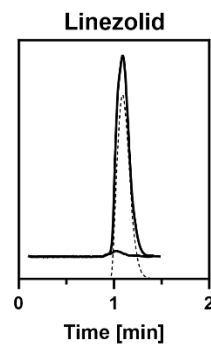

Pretomanid + WHO group B

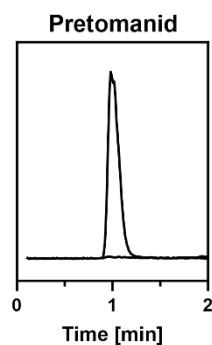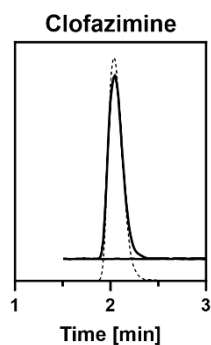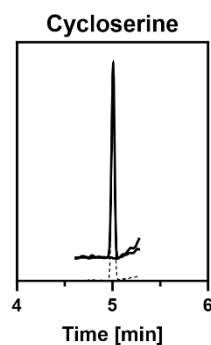

WHO group C

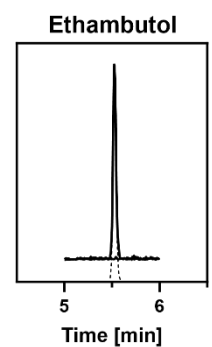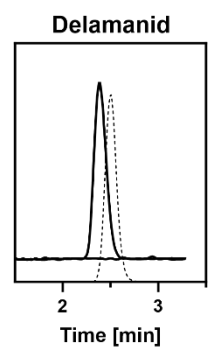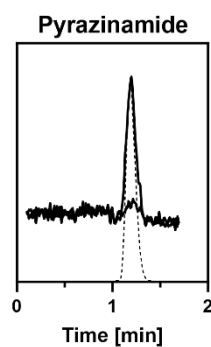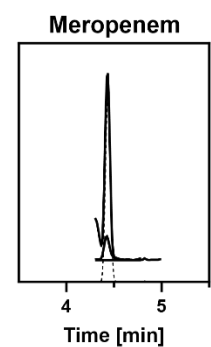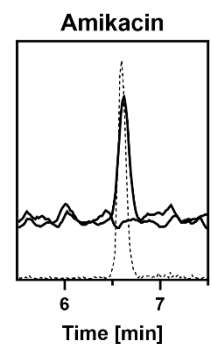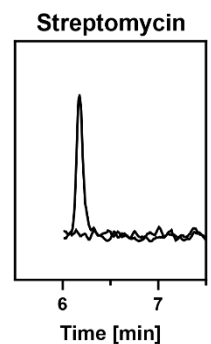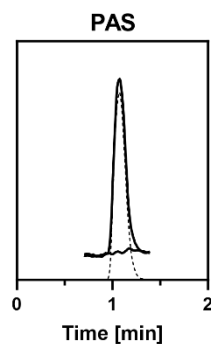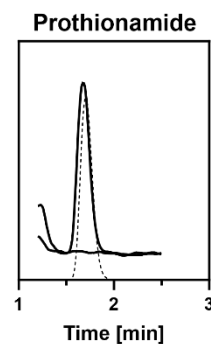

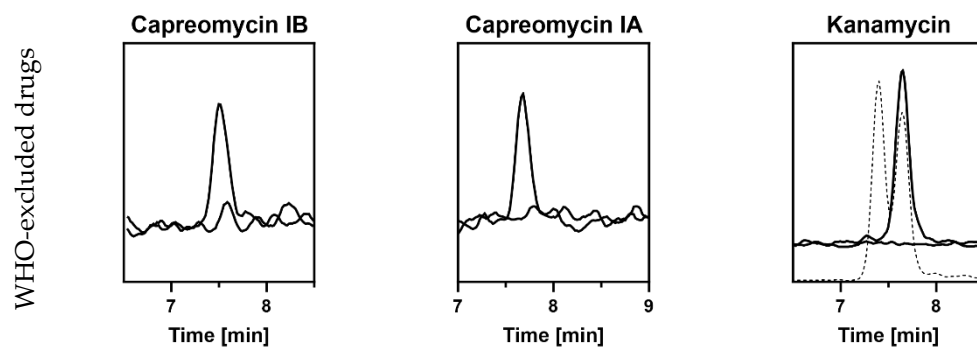

**Figure S3. Selectivity: Analyte-, IS-, and matrix signal at LLOQ.** The matrix signal did not exceed 20% of the analyte peak at the lower limit of quantification (LLOQ) in any of the analytes. All signals were recorded during calibration runs: The matrix signal was recorded in blank matrix samples before the first calibrator, analyte- and IS signal in the calibrator that represented the LLOQ.

**Table S9.** Specificity assessment by comparing analyte mass transitions with fragmentation mass spectra of common co-medications.

| Drug                  | Formula      | Accession number           | platform         | Ion mode                 | CE [eV]   | Precursor     | Fragment     | % intensity | Source                                                                    |
|-----------------------|--------------|----------------------------|------------------|--------------------------|-----------|---------------|--------------|-------------|---------------------------------------------------------------------------|
| <b>Cycloserine</b>    |              |                            | <b>LC-ESI-QQ</b> | <b>[M+H]<sup>+</sup></b> | <b>10</b> | <b>102.88</b> | <b>75.03</b> |             |                                                                           |
| <b>D-Cycloserine</b>  |              |                            | <b>LC-ESI-QQ</b> | <b>[M+H]<sup>+</sup></b> | <b>10</b> | <b>106.22</b> | <b>78.85</b> |             |                                                                           |
| Allopurinol           | C5H4N4O      | MSBNK-Fiocruz-FIO00457     | LC-ESI-QTOF      | [M+H] <sup>+</sup>       | 30        | 110.04        | 110.04       | 99.9        | <a href="https://massbank.eu/MassBank">https://massbank.eu/MassBank</a>   |
| Allopurinol           | C5H4N4O      | MSBNK-Fiocruz-FIO00457     | LC-ESI-QTOF      | [M+H] <sup>+</sup>       | 30        | 110.04        | 110.04       | 99.9        | <a href="https://massbank.eu/MassBank">https://massbank.eu/MassBank</a>   |
| <b>Pyrazinamide</b>   |              |                            | <b>LC-ESI-QQ</b> | <b>[M+H]<sup>+</sup></b> | <b>20</b> | <b>123.68</b> | <b>78.88</b> |             |                                                                           |
| <b>D-Pyrazinamide</b> |              |                            | <b>LC-ESI-QQ</b> | <b>[M+H]<sup>+</sup></b> | <b>20</b> | <b>127.21</b> | <b>82.85</b> |             |                                                                           |
| Metformin             | C4H11N5      | MSBNK-Keio_Univ-KO003374   | LC-ESI-QQ        | [M+H] <sup>+</sup>       | 30        | 130.00        | 71.00        | 99.9        | <a href="https://massbank.eu/MassBank">https://massbank.eu/MassBank</a>   |
| Metformin             | C4H11N5      | MSBNK-Keio_Univ-KO003375   | LC-ESI-QQ        | [M+H] <sup>+</sup>       | 30        | 130.00        | 71.10        | 99.9        | <a href="https://massbank.eu/MassBank">https://massbank.eu/MassBank</a>   |
| <b>Isoniazid</b>      |              |                            | <b>LC-ESI-QQ</b> | <b>[M+H]<sup>+</sup></b> | <b>25</b> | <b>137.68</b> | <b>78.50</b> |             |                                                                           |
| <b>D-Isoniazid</b>    |              |                            | <b>LC-ESI-QQ</b> | <b>[M+H]<sup>+</sup></b> | <b>25</b> | <b>141.72</b> | <b>82.60</b> |             |                                                                           |
| Valproic acid         | C22H25F2NO94 | DB00403                    | LC-ESI-QQ        | [M+H] <sup>+</sup>       | 25        | 145.00        | 144.41       | 100.0       | <a href="https://go.drugbank.com/drugs">https://go.drugbank.com/drugs</a> |
| Dexamethasone         | C22H29FO5    | MSBNK-Fiocruz-FIO00437     | LC-ESI-QTOF      | [M+H] <sup>+</sup>       | 30        | 147.08        | 147.08       | 99.9        | <a href="https://massbank.eu/MassBank">https://massbank.eu/MassBank</a>   |
| <b>PAS</b>            |              |                            | <b>LC-ESI-QQ</b> | <b>[M+H]<sup>+</sup></b> | <b>25</b> | <b>153.64</b> | <b>91.17</b> |             |                                                                           |
| Mesalazine            | C7H7NO3      | MSBNK-CASMI_2016-SM862104  | LC-ESI-QFT       | [M+H] <sup>+</sup>       | 35        | 154.05        | 91.05        | 1.0         | <a href="https://massbank.eu/MassBank">https://massbank.eu/MassBank</a>   |
| <b>D-PAS</b>          |              |                            | <b>LC-ESI-QQ</b> | <b>[M+H]<sup>+</sup></b> | <b>25</b> | <b>159.94</b> | <b>96.09</b> |             |                                                                           |
| Pregabalin            | C8H17NO2     | MSBNK-Athens_Univ-AU166803 | LC-ESI-QTOF      | [M+H] <sup>+</sup>       | 30        | 160.13        | 142.12       | 99.9        | <a href="https://massbank.eu/MassBank">https://massbank.eu/MassBank</a>   |
| Nicotine              | C10H14N2     | MSBNK-Eawag-EQ300802       | LC-ESI-QFT       | [M+H] <sup>+</sup>       | 30        | 163.12        | 94.06        | 0.3         | <a href="https://massbank.eu/MassBank">https://massbank.eu/MassBank</a>   |

|                        |             |                                  |                  |                          |                   |               |                   |       |                                                                           |
|------------------------|-------------|----------------------------------|------------------|--------------------------|-------------------|---------------|-------------------|-------|---------------------------------------------------------------------------|
| N-Acetyl-L-cysteine    | C5H9NO3S    | MSBNK-RIKEN_ReSpect-<br>PS030401 | LC-ESI-QQ        | [M+H] <sup>+</sup>       | 30                | 164.12        | 122.00            | 99.9  | <a href="https://massbank.eu/MassBank">https://massbank.eu/MassBank</a>   |
| Levetiracetam          | C8H14N2O2   | MSBNK-Athens_Univ-<br>AU160503   | LC-ESI-<br>QTOF  | [M+H] <sup>+</sup>       | 30                | 171.11        | 126.09            | 99.9  | <a href="https://massbank.eu/MassBank">https://massbank.eu/MassBank</a>   |
| Gabapentin             | C9H17NO2    | MSBNK-Athens_Univ-<br>AU167803   | LC-ESI-<br>QTOF  | [M+H] <sup>+</sup>       | 30                | 172.13        | 137.10            | 99.9  | <a href="https://massbank.eu/MassBank">https://massbank.eu/MassBank</a>   |
| <b>Prothionamide</b>   |             |                                  | <b>LC-ESI-QQ</b> | <b>[M+H]<sup>+</sup></b> | <b>25</b>         | <b>180.57</b> | <b>120.94</b>     |       |                                                                           |
| <b>D-Prothionamide</b> |             |                                  | <b>LC-ESI-QQ</b> | <b>[M+H]<sup>+</sup></b> | <b>25</b>         | <b>187.58</b> | <b>127.38</b>     |       |                                                                           |
| N-Acetyl mesalazine    | C9H9NO4     | MSBNK-Athens_Univ-<br>AU272503   | LC-ESI-<br>QTOF  | [M+H] <sup>+</sup>       | 30                | 196.06        | 136.04            | 99.9  | <a href="https://massbank.eu/MassBank">https://massbank.eu/MassBank</a>   |
| <b>Clavulanic acid</b> |             |                                  | <b>LC-ESI-QQ</b> | <b>[M+H]<sup>+</sup></b> | <b>10</b>         | <b>198.00</b> | <b>136.00</b>     |       |                                                                           |
| <b>Ethambutol</b>      |             |                                  | <b>LC-ESI-QQ</b> | <b>[M+H]<sup>+</sup></b> | <b>25</b>         | <b>204.78</b> | <b>44.29</b>      |       |                                                                           |
| Ibuprofen              | C13H18O2    | MSBNK-RIKEN_ReSpect-<br>PS025302 | LC-ESI-QQ        | [M+H] <sup>+</sup>       | 20                | 207.17        | 81.00             | 3.0   | <a href="https://massbank.eu/MassBank">https://massbank.eu/MassBank</a>   |
| <b>D-Ethambutol</b>    |             |                                  | <b>LC-ESI-QQ</b> | <b>[M+H]<sup>+</sup></b> | <b>25</b>         | <b>208.78</b> | <b>48.29</b>      |       |                                                                           |
| Clonidine              | C9H9Cl2N3   | MSBNK-Keio_Univ-<br>KO002629     | LC-ESI-QQ        | [M+H] <sup>+</sup>       | 30                | 230.00        | 230.20            | 99.9  | <a href="https://massbank.eu/MassBank">https://massbank.eu/MassBank</a>   |
| Naproxen               | C14H14O3    | MSBNK-Athens_Univ-<br>AU265103   | LC-ESI-<br>QTOF  | [M+H] <sup>+</sup>       | 30                | 231.10        | 185.10            | 99.9  | <a href="https://massbank.eu/MassBank">https://massbank.eu/MassBank</a>   |
| Salbutamol             | C13H21NO3   | MSBNK-Athens_Univ-<br>AU110002   | LC-ESI-<br>QTOF  | [M+H] <sup>+</sup>       | ramp<br>19.4-29.2 | 240.16        | 148.08            | 99.9  | <a href="https://massbank.eu/MassBank">https://massbank.eu/MassBank</a>   |
| Pyridoxal phosphate    | C8H10NO6P   | DB00225                          | LC-ESI-QQ        | [M+H] <sup>+</sup>       | 25                | 248.00        | 94.000<br>100.000 | 100.0 | <a href="https://go.drugbank.com/drugs">https://go.drugbank.com/drugs</a> |
| Emtricitabine          | C8H10FN3O3S | MSBNK-Eawag-EQ310652             | LC-ESI-QFT       | [M+H] <sup>+</sup>       | 30                | 248.05        | 130.04            | 99.9  | <a href="https://massbank.eu/MassBank">https://massbank.eu/MassBank</a>   |
| Sulfamethoxazole       | C10H11N3O3S | MSBNK-HBM4EU-<br>HB002604        | LC-ESI-<br>QTOF  | [M+H] <sup>+</sup>       | 30                | 254.06        | 65.04             | 99.9  | <a href="https://massbank.eu/MassBank">https://massbank.eu/MassBank</a>   |
| Triamterene            | C12H11N7    | MSBNK-Athens_Univ-<br>AU110903   | LC-ESI-<br>QTOF  | [M+H] <sup>+</sup>       | 30                | 254.11        | 254.11            | 99.9  | <a href="https://massbank.eu/MassBank">https://massbank.eu/MassBank</a>   |



|                    |                         |                            |             |                    |                   |        |        |      |                                                                           |
|--------------------|-------------------------|----------------------------|-------------|--------------------|-------------------|--------|--------|------|---------------------------------------------------------------------------|
| Tramadol           | C16H25NO2               | MSBNK-Athens_Univ-AU111703 | LC-ESI-QTOF | [M+H] <sup>+</sup> | 30                | 264.20 | 159.08 | 99.9 | <a href="https://massbank.eu/MassBank">https://massbank.eu/MassBank</a>   |
| Thiamine           | C12H17N4OS <sup>+</sup> | MSBNK-Keio_Univ-KO004188   | LC-ESI-QQ   | [M+H] <sup>+</sup> | 30                | 266.00 | 122.20 | 99.9 | <a href="https://massbank.eu/MassBank">https://massbank.eu/MassBank</a>   |
| Mirtazapine        | C17H19N3                | MSBNK-Athens_Univ-AU155109 | LC-ESI-QTOF | [M+H] <sup>+</sup> | 30                | 266.17 | 195.09 | 99.9 | <a href="https://massbank.eu/MassBank">https://massbank.eu/MassBank</a>   |
| Nevirapine         | C15H14N4O               | DB00268                    | predicted   | [M+H] <sup>+</sup> | 20                | 267.00 | 267.12 | 51.7 | <a href="https://go.drugbank.com/drugs">https://go.drugbank.com/drugs</a> |
| Metoprolol         | C15H25NO3               | MSBNK-Athens_Univ-AU110703 | LC-ESI-QTOF | [M+H] <sup>+</sup> | 30                | 268.19 | 133.06 | 99.9 | <a href="https://massbank.eu/MassBank">https://massbank.eu/MassBank</a>   |
| Moclobemide        | C13H17ClN2O2            | MSBNK-Athens_Univ-AU227903 | LC-ESI-QTOF | [M+H] <sup>+</sup> | 30                | 269.11 | 182.04 | 99.9 | <a href="https://massbank.eu/MassBank">https://massbank.eu/MassBank</a>   |
| 17-alpha-Estradiol | C18H24O2                | MSBNK-Athens_Univ-AU281703 | LC-ESI-QTOF | [M+H] <sup>+</sup> | 30                | 273.18 | 255.17 | 99.9 | <a href="https://massbank.eu/MassBank">https://massbank.eu/MassBank</a>   |
| 17-beta-Estradiol  | C18H24O2                | MSBNK-Athens_Univ-AU279703 | LC-ESI-QTOF | [M+H] <sup>+</sup> | 30                | 273.18 | 255.17 | 99.9 | <a href="https://massbank.eu/MassBank">https://massbank.eu/MassBank</a>   |
| Amitriptyline      | C20H23N                 | MSBNK-Athens_Univ-AU150403 | LC-ESI-QTOF | [M+H] <sup>+</sup> | 30                | 278.19 | 191.08 | 99.9 | <a href="https://massbank.eu/MassBank">https://massbank.eu/MassBank</a>   |
| Doxepine           | C19H21NO                | MSBNK-Athens_Univ-AU153206 | LC-ESI-QTOF | [M+H] <sup>+</sup> | ramp<br>20.9-31.4 | 280.17 | 280.17 | 99.9 | <a href="https://massbank.eu/MassBank">https://massbank.eu/MassBank</a>   |
| Phenprocoumon      | C18H16O33               | DB00976                    | predicted   | [M+H] <sup>+</sup> | 20                | 281.00 | 281.12 | 37.5 | <a href="https://go.drugbank.com/drugs">https://go.drugbank.com/drugs</a> |
| Risedronic acid    | C7H11NO7P7              | DB00889                    | predicted   | [M+H] <sup>+</sup> | 40                | 284.00 | 80.97  | 30.8 | <a href="https://go.drugbank.com/drugs">https://go.drugbank.com/drugs</a> |
| Diazepam           | C16H13ClN2O             | MSBNK-Athens_Univ-AU160803 | LC-ESI-QTOF | [M+H] <sup>+</sup> | 30                | 285.08 | 285.08 | 99.9 | <a href="https://massbank.eu/MassBank">https://massbank.eu/MassBank</a>   |
| Probenecid         | C13H19NO4S              | DB01067                    | predicted   | [M+H] <sup>+</sup> | 40                | 286.00 | 43.05  | 68.3 | <a href="https://go.drugbank.com/drugs">https://go.drugbank.com/drugs</a> |
| Morphine           | C17H19NO3               | MSBNK-Athens_Univ-AU158003 | LC-ESI-QTOF | [M+H] <sup>+</sup> | 30                | 286.14 | 286.15 | 99.9 | <a href="https://massbank.eu/MassBank">https://massbank.eu/MassBank</a>   |
| Oxazepam           | C15H11ClN2O2            | MSBNK-Athens_Univ-AU268003 | LC-ESI-QTOF | [M+H] <sup>+</sup> | 30                | 287.06 | 241.05 | 99.9 | <a href="https://massbank.eu/MassBank">https://massbank.eu/MassBank</a>   |

|                            |               |                                 |             |                    |    |        |        |       |                                                                           |
|----------------------------|---------------|---------------------------------|-------------|--------------------|----|--------|--------|-------|---------------------------------------------------------------------------|
| Tenofovir                  | C9H14N5O4P    | MSBNK-Eawag-EQ310502            | LC-ESI-QFT  | [M+H] <sup>+</sup> | 30 | 288.09 | 288.09 | 99.9  | <a href="https://massbank.eu/MassBank">https://massbank.eu/MassBank</a>   |
| Atropine                   | C17H23NO3     | MSBNK-Keio_Univ-KO002225        | LC-ESI-QQ   | [M+H] <sup>+</sup> | 30 | 290.00 | 124.20 | 99.9  | <a href="https://massbank.eu/MassBank">https://massbank.eu/MassBank</a>   |
| Trimethoprim               | C14H18N4O3    | MSBNK-Keio_Univ-KO004154        | LC-ESI-QQ   | [M+H] <sup>+</sup> | 30 | 291.00 | 230.20 | 99.9  | <a href="https://massbank.eu/MassBank">https://massbank.eu/MassBank</a>   |
| Dimetindene                | C20H24N24     | DB08823                         | predicted   | [M+H] <sup>+</sup> | 20 | 293.00 | 248.14 | 17.2  | <a href="https://go.drugbank.com/drugs">https://go.drugbank.com/drugs</a> |
| Diclofenac                 | C14H11Cl2NO2  | MSBNK-Keio_Univ-KO002783        | LC-ESI-QQ   | [M+H] <sup>+</sup> | 30 | 296.00 | 215.20 | 99.9  | <a href="https://massbank.eu/MassBank">https://massbank.eu/MassBank</a>   |
| N4-Acetyl-Sulfamethoxazole | C12H13N3O4S   | MSBNK-Athens_Univ-AU201403      | LC-ESI-QTOF | [M+H] <sup>+</sup> | 30 | 296.07 | 134.06 | 99.9  | <a href="https://massbank.eu/MassBank">https://massbank.eu/MassBank</a>   |
| 17a-Ethynylestradiol       | C20H24O2      | MSBNK-Eawag-EQ306502            | LC-ESI-QFT  | [M+H] <sup>+</sup> | 30 | 297.18 | 107.05 | 99.9  | <a href="https://massbank.eu/MassBank">https://massbank.eu/MassBank</a>   |
| Hydrochlorothiazide        | C7H8ClN3O4S69 | DB01066                         | LC-ESI-QQ   | [M+H] <sup>+</sup> | 25 | 298.00 | 156.44 | 100.0 | <a href="https://go.drugbank.com/drugs">https://go.drugbank.com/drugs</a> |
| Norethindrone              | C20H26O2      | MSBNK-Athens_Univ-AU279803      | LC-ESI-QTOF | [M+H] <sup>+</sup> | 30 | 299.20 | 231.17 | 99.9  | <a href="https://massbank.eu/MassBank">https://massbank.eu/MassBank</a>   |
| Codeine                    | C18H21NO3     | MSBNK-IPB_Halle-PB001606        | LC-ESI-QQ   | [M+H] <sup>+</sup> | 35 | 300.00 | 300.00 | 99.9  | <a href="https://massbank.eu/MassBank">https://massbank.eu/MassBank</a>   |
| Metoclopramide             | C14H22ClN3O2  | MSBNK-Athens_Univ-AU228903      | LC-ESI-QTOF | [M+H] <sup>+</sup> | 30 | 300.15 | 227.06 | 99.9  | <a href="https://massbank.eu/MassBank">https://massbank.eu/MassBank</a>   |
| Tazobactam                 | C10H12N4O5S   | DB01622                         | predicted   | [M+H] <sup>+</sup> | 20 | 301.00 | 232.03 | 36.8  | <a href="https://go.drugbank.com/drugs">https://go.drugbank.com/drugs</a> |
| Dihydrocodeine             | C18H23NO3     | MSBNK-Athens_Univ-AU217803      | LC-ESI-QTOF | [M+H] <sup>+</sup> | 30 | 302.18 | 302.18 | 99.9  | <a href="https://massbank.eu/MassBank">https://massbank.eu/MassBank</a>   |
| Scopolamine                | C17H21NO4     | MSBNK-Keio_Univ-KO004014        | LC-ESI-QQ   | [M+H] <sup>+</sup> | 30 | 304.00 | 138.20 | 99.9  | <a href="https://massbank.eu/MassBank">https://massbank.eu/MassBank</a>   |
| Fenoterol                  | C17H21NO4     | MSBNK-Univ_Connecticut-CO000198 | LC-ESI-QTOF | [M+H] <sup>+</sup> | 30 | 304.16 | 107.05 | 99.9  | <a href="https://massbank.eu/MassBank">https://massbank.eu/MassBank</a>   |
| Methadone                  | C21H27NO      | MSBNK-Athens_Univ-AU162803      | LC-ESI-QTOF | [M+H] <sup>+</sup> | 30 | 310.22 | 265.16 | 99.9  | <a href="https://massbank.eu/MassBank">https://massbank.eu/MassBank</a>   |
| Biperiden                  | C21H29NO      | DB00824                         | predicted   | [M+H] <sup>+</sup> | 20 | 312.00 | 98.10  | 38.2  | <a href="https://go.drugbank.com/drugs">https://go.drugbank.com/drugs</a> |

|                       |               |                            |                  |                          |           |               |               |      |                                                                           |
|-----------------------|---------------|----------------------------|------------------|--------------------------|-----------|---------------|---------------|------|---------------------------------------------------------------------------|
| Olanzapine            | C17H20N4S     | MSBNK-Athens_Univ-AU151703 | LC-ESI-QTOF      | [M+H] <sup>+</sup>       | 30        | 313.15        | 169.08        | 1.9  | <a href="https://massbank.eu/MassBank">https://massbank.eu/MassBank</a>   |
| Ranitidine            | C13H22N4O3S   | MSBNK-Keio_Univ-KO003964   | LC-ESI-QQ        | [M+H] <sup>+</sup>       | 30        | 315.00        | 176.10        | 99.9 | <a href="https://massbank.eu/MassBank">https://massbank.eu/MassBank</a>   |
| Oxycodone             | C18H21NO4     | MSBNK-IPB_Halle-PB002102   | LC-ESI-QQ        | [M+H] <sup>+</sup>       | 30        | 316.00        | 298.00        | 99.9 | <a href="https://massbank.eu/MassBank">https://massbank.eu/MassBank</a>   |
| Tamsulosin            | C15H10Cl2N2O2 | MSBNK-Athens_Univ-AU151203 | LC-ESI-QTOF      | [M+H] <sup>+</sup>       | 30        | 321.02        | 275.01        | 99.9 | <a href="https://massbank.eu/MassBank">https://massbank.eu/MassBank</a>   |
| Clopidogrel           | C16H16ClNO2S  | MSBNK-Athens_Univ-AU228403 | LC-ESI-QTOF      | [M+H] <sup>+</sup>       | 30        | 322.07        | 184.05        | 99.9 | <a href="https://massbank.eu/MassBank">https://massbank.eu/MassBank</a>   |
| Citalopram            | C20H21FN2O    | MSBNK-Athens_Univ-AU151303 | LC-ESI-QTOF      | [M+H] <sup>+</sup>       | 30        | 325.17        | 262.10        | 99.9 | <a href="https://massbank.eu/MassBank">https://massbank.eu/MassBank</a>   |
| Midazolam             | C18H13ClFN3   | MSBNK-Athens_Univ-AU155903 | LC-ESI-QTOF      | [M+H] <sup>+</sup>       | 30        | 326.09        | 326.09        | 99.9 | <a href="https://massbank.eu/MassBank">https://massbank.eu/MassBank</a>   |
| <b>Capreomycin IB</b> |               |                            | <b>LC-ESI-QQ</b> | <b>[M+H]<sup>+</sup></b> | <b>20</b> | <b>326.21</b> | <b>70.18</b>  |      |                                                                           |
| Bisoprolol            | C18H31NO4     | MSBNK-Athens_Univ-AU267703 | LC-ESI-QTOF      | [M+H] <sup>+</sup>       | 30        | 326.23        | 115.05        | 1.3  | <a href="https://massbank.eu/MassBank">https://massbank.eu/MassBank</a>   |
| Levomepromazine       | C19H24N2OS    | MSBNK-Keio_Univ-KO003494   | LC-ESI-QQ        | [M+H] <sup>+</sup>       | 30        | 329.00        | 100.20        | 99.9 | <a href="https://massbank.eu/MassBank">https://massbank.eu/MassBank</a>   |
| Furosemide            | C12H11ClN2O5S | MSBNK-Athens_Univ-AU269203 | LC-ESI-QTOF      | [M+H] <sup>+</sup>       | 30        | 331.02        | 149.06        | 99.9 | <a href="https://massbank.eu/MassBank">https://massbank.eu/MassBank</a>   |
| <b>Capreomycin IA</b> |               |                            | <b>LC-ESI-QQ</b> | <b>[M+H]<sup>+</sup></b> | <b>20</b> | <b>334.27</b> | <b>70.24</b>  |      |                                                                           |
| <b>Linezolid</b>      |               |                            | <b>LC-ESI-QQ</b> | <b>[M+H]<sup>+</sup></b> | <b>25</b> | <b>337.17</b> | <b>195.20</b> |      |                                                                           |
| Medrogestone          | C23H32O32     | DB09154                    | predicted        | [M+H] <sup>+</sup>       | 20        | 341.00        | 341.25        | 13.4 | <a href="https://go.drugbank.com/drugs">https://go.drugbank.com/drugs</a> |
| Formoterol            | C19H24N2O51   | DB01030                    | predicted        | [M+H] <sup>+</sup>       | 40        | 345.00        | 149.10        | 18.6 | <a href="https://go.drugbank.com/drugs">https://go.drugbank.com/drugs</a> |
| <b>D-Linezolid</b>    |               |                            | <b>LC-ESI-QQ</b> | <b>[M+H]<sup>+</sup></b> | <b>25</b> | <b>345.10</b> | <b>203.20</b> |      |                                                                           |
| Omeprazole            | C17H19N3O3S   | MSBNK-Athens_Univ-AU111303 | LC-ESI-QTOF      | [M+H] <sup>+</sup>       | 30        | 346.12        | 200.06        | 2.4  | <a href="https://massbank.eu/MassBank">https://massbank.eu/MassBank</a>   |

|                       |                        |                                 |                  |                          |           |               |               |      |                                                                           |
|-----------------------|------------------------|---------------------------------|------------------|--------------------------|-----------|---------------|---------------|------|---------------------------------------------------------------------------|
| Indomethacin          | C19H16ClNO4            | MSBNK-Athens_Univ-AU271403      | LC-ESI-QTOF      | [M+H] <sup>+</sup>       | 30        | 358.08        | 174.09        | 5.8  | <a href="https://massbank.eu/MassBank">https://massbank.eu/MassBank</a>   |
| <b>Pretomanid</b>     |                        |                                 | <b>LC-ESI-QQ</b> | <b>[M+H]<sup>+</sup></b> | <b>25</b> | <b>359.00</b> | <b>174.82</b> |      |                                                                           |
| Prednisone            | C21H26O5               | MSBNK-Athens_Univ-AU240103      | LC-ESI-QTOF      | [M+H] <sup>+</sup>       | 30        | 359.19        | 147.08        | 99.9 | <a href="https://massbank.eu/MassBank">https://massbank.eu/MassBank</a>   |
| Prednisolone          | C21H28O5               | MSBNK-Athens_Univ-AU239803      | LC-ESI-QTOF      | [M+H] <sup>+</sup>       | 30        | 361.20        | 261.13        | 3.6  | <a href="https://massbank.eu/MassBank">https://massbank.eu/MassBank</a>   |
| Scopolamine-N-butyl   | C21H30NO4 <sup>+</sup> | MSBNK-Athens_Univ-AU251503      | LC-ESI-QTOF      | [M+H] <sup>+</sup>       | 30        | 361.22        | 360.22        | 99.9 | <a href="https://massbank.eu/MassBank">https://massbank.eu/MassBank</a>   |
| <b>Levofloxacin</b>   |                        |                                 | <b>LC-ESI-QQ</b> | <b>[M+H]<sup>+</sup></b> | <b>30</b> | <b>361.82</b> | <b>261.17</b> |      |                                                                           |
| Bisacodyl             | C22H19NO11             | DB09027                         | predicted        | [M+H] <sup>+</sup>       | 20        | 362.00        | 260.11        | 5.3  | <a href="https://go.drugbank.com/drugs">https://go.drugbank.com/drugs</a> |
| Bisacodyl             | C22H19NO46             | DB09062                         | predicted        | [M+H] <sup>+</sup>       | 40        | 362.00        | 260.11        | 10.5 | <a href="https://go.drugbank.com/drugs">https://go.drugbank.com/drugs</a> |
| Hydrocortisone        | C21H30O5               | MSBNK-Univ_Connecticut-CO000223 | LC-ESI-QTOF      | [M+H] <sup>+</sup>       | 30        | 363.22        | 261.16        | 2.0  | <a href="https://massbank.eu/MassBank">https://massbank.eu/MassBank</a>   |
| <b>D-Levofloxacin</b> |                        |                                 | <b>LC-ESI-QQ</b> | <b>[M+H]<sup>+</sup></b> | <b>30</b> | <b>366.04</b> | <b>261.04</b> |      |                                                                           |
| Haloperidol           | C21H23ClFNO2           | MSBNK-Athens_Univ-AU112203      | LC-ESI-QTOF      | [M+H] <sup>+</sup>       | 30        | 376.15        | 165.07        | 99.9 | <a href="https://massbank.eu/MassBank">https://massbank.eu/MassBank</a>   |
| Celecoxib             | C17H14F3N3O2S          | MSBNK-Athens_Univ-AU235603      | LC-ESI-QTOF      | [M+H] <sup>+</sup>       | 30        | 382.08        | 184.04        | 0.7  | <a href="https://massbank.eu/MassBank">https://massbank.eu/MassBank</a>   |
| <b>Meropenem</b>      |                        |                                 | <b>LC-ESI-QQ</b> | <b>[M+H]<sup>+</sup></b> | <b>30</b> | <b>383.95</b> | <b>68.04</b>  |      |                                                                           |
| Pantoprazole          | C16H15F2N3O4S          | MSBNK-Athens_Univ-AU227403      | LC-ESI-QTOF      | [M+H] <sup>+</sup>       | 30        | 384.08        | 122.06        | 0.8  | <a href="https://massbank.eu/MassBank">https://massbank.eu/MassBank</a>   |
| Zopiclone             | C17H17ClN6O3           | MSBNK-Eawag-EQ364302            | LC-ESI-QFT       | [M+H] <sup>+</sup>       | 30        | 389.11        | 84.07         | 0.1  | <a href="https://massbank.eu/MassBank">https://massbank.eu/MassBank</a>   |
| <b>D-Meropenem</b>    |                        |                                 | <b>LC-ESI-QQ</b> | <b>[M+H]<sup>+</sup></b> | <b>30</b> | <b>389.96</b> | <b>68.06</b>  |      |                                                                           |
| <b>Moxifloxacin</b>   |                        |                                 | <b>LC-ESI-QQ</b> | <b>[M+H]<sup>+</sup></b> | <b>35</b> | <b>401.67</b> | <b>364.21</b> |      |                                                                           |
| Nebivolol             | C22H25F2NO34           | DB04891                         | predicted        | [M+H] <sup>+</sup>       | 20        | 406.00        | 406.18        | 4.5  | <a href="https://go.drugbank.com/drugs">https://go.drugbank.com/drugs</a> |
| <b>D-Moxifloxacin</b> |                        |                                 | <b>LC-ESI-QQ</b> | <b>[M+H]<sup>+</sup></b> | <b>35</b> | <b>407.30</b> | <b>369.08</b> |      |                                                                           |

|                           |               |                                      |                  |                          |                   |               |               |      |                                                                           |
|---------------------------|---------------|--------------------------------------|------------------|--------------------------|-------------------|---------------|---------------|------|---------------------------------------------------------------------------|
| Sitagliptin               | C16H15F6N5O   | MSBNK-Athens_Univ-AU225703           | LC-ESI-QTOF      | [M+H] <sup>+</sup>       | 30                | 408.13        | 391.10        | 9.9  | <a href="https://massbank.eu/MassBank">https://massbank.eu/MassBank</a>   |
| Amlodipine                | C20H25ClN2O5  | MSBNK-Athens_Univ-AU154406           | LC-ESI-QTOF      | [M+H] <sup>+</sup>       | ramp<br>23.8-35.7 | 409.15        | 238.06        | 99.9 | <a href="https://massbank.eu/MassBank">https://massbank.eu/MassBank</a>   |
| Ezetemibe                 | C24H21F2NO32  | DB01002                              | predicted        | [M+H] <sup>+</sup>       | 20                | 410.00        | 392.15        | 14.5 | <a href="https://go.drugbank.com/drugs">https://go.drugbank.com/drugs</a> |
| Risperidone               | C23H27FN4O2   | MSBNK-Athens_Univ-AU150503           | LC-ESI-QTOF      | [M+H] <sup>+</sup>       | 30                | 411.22        | 191.12        | 99.9 | <a href="https://massbank.eu/MassBank">https://massbank.eu/MassBank</a>   |
| Ramipril                  | C23H32N2O26   | DB00199                              | predicted        | [M+H] <sup>+</sup>       | 20                | 417.00        | 234.15        | 22.8 | <a href="https://go.drugbank.com/drugs">https://go.drugbank.com/drugs</a> |
| Spirolactone              | C24H32O4S     | DB00477                              | predicted        | [M+H] <sup>+</sup>       | 40                | 417.00        | 329.19        | 2.1  | <a href="https://go.drugbank.com/drugs">https://go.drugbank.com/drugs</a> |
| Simvastatin               | C25H38O5      | MSBNK-Athens_Univ-AU112803           | LC-ESI-QTOF      | [M+H] <sup>+</sup>       | 30                | 419.28        | 199.15        | 99.9 | <a href="https://massbank.eu/MassBank">https://massbank.eu/MassBank</a>   |
| Dolutegravir              | C20H19F2N3O11 | DB08936                              | predicted        | [M+H] <sup>+</sup>       | 20                | 420.00        | 142.05        | 31.5 | <a href="https://go.drugbank.com/drugs">https://go.drugbank.com/drugs</a> |
| Candesartan               | C24H20N6O3    | MSBNK-Athens_Univ-AU213703           | LC-ESI-QTOF      | [M+H] <sup>+</sup>       | 30                | 441.17        | 207.09        | 99.9 | <a href="https://massbank.eu/MassBank">https://massbank.eu/MassBank</a>   |
| Folic acid                | C19H19N7O6    | MSBNK-Washington_State_Univ-BML00977 | LC-ESI-QTOF      | [M+H] <sup>+</sup>       | CE40              | 442.15        | 176.06        | 99.9 | <a href="https://massbank.eu/MassBank">https://massbank.eu/MassBank</a>   |
| Folic acid                | C19H19N7O6    | MSBNK-Univ_Connecticut-CO000203      | LC-ESI-QTOF      | [M+H] <sup>+</sup>       | 30                | 442.15        | 295.10        | 99.9 | <a href="https://massbank.eu/MassBank">https://massbank.eu/MassBank</a>   |
| Glycoursodeoxycholic acid | 0             | MSBNK-BGC_Munich-RP005503            | LC-ESI-QTOF      | [M+H] <sup>+</sup>       | 40                | 450.32        | 76.04         | 99.9 | <a href="https://massbank.eu/MassBank">https://massbank.eu/MassBank</a>   |
| Buprenorphine             | C29H41NO4     | MSBNK-Univ_Connecticut-CO000093      | LC-ESI-QTOF      | [M+H] <sup>+</sup>       | 30                | 468.31        | 468.31        | 99.9 | <a href="https://massbank.eu/MassBank">https://massbank.eu/MassBank</a>   |
| <b>Clofazimine</b>        |               |                                      | <b>LC-ESI-QQ</b> | <b>[M+H]<sup>+</sup></b> | <b>45</b>         | <b>471.61</b> | <b>395.25</b> |      |                                                                           |
| Loperamide                | C29H33ClN2O2  | MSBNK-Keio_Univ-KO003324             | LC-ESI-QQ        | [M+H] <sup>+</sup>       | 30                | 477.00        | 149.40        | 0.1  | <a href="https://massbank.eu/MassBank">https://massbank.eu/MassBank</a>   |
| <b>Gentamicin</b>         |               |                                      | <b>LC-ESI-QQ</b> | <b>[M+H]<sup>+</sup></b> | <b>20</b>         | <b>477.43</b> | <b>157.15</b> |      |                                                                           |
| <b>D-Clofazimine</b>      |               |                                      | <b>LC-ESI-QQ</b> | <b>[M+H]<sup>+</sup></b> | <b>45</b>         | <b>480.00</b> | <b>396.15</b> |      |                                                                           |

|                        |                |                            |                  |                          |                   |               |               |      |                                                                           |
|------------------------|----------------|----------------------------|------------------|--------------------------|-------------------|---------------|---------------|------|---------------------------------------------------------------------------|
| <b>Kanamycin</b>       |                |                            | <b>LC-ESI-QQ</b> | <b>[M+H]<sup>+</sup></b> | <b>25</b>         | <b>484.46</b> | <b>162.48</b> |      |                                                                           |
| <b>D-Kanamycin</b>     |                |                            | <b>LC-ESI-QQ</b> | <b>[M+H]<sup>+</sup></b> | <b>25</b>         | <b>490.63</b> | <b>162.52</b> |      |                                                                           |
| Fluticasone propionate | C25H31F3O5S    | MSBNK-Athens_Univ-AU283103 | LC-ESI-QTOF      | [M+H] <sup>+</sup>       | 30                | 501.19        | 293.15        | 99.9 | <a href="https://massbank.eu/MassBank">https://massbank.eu/MassBank</a>   |
| Piperacillin           | C23H27N5O7S    | MSBNK-Keio_Univ-KO003720   | LC-ESI-QQ        | [M+H] <sup>+</sup>       | 30                | 518.00        | 204.60        | 99.9 | <a href="https://massbank.eu/MassBank">https://massbank.eu/MassBank</a>   |
| <b>Delamanid</b>       |                |                            | <b>LC-ESI-QQ</b> | <b>[M+H]<sup>+</sup></b> | <b>25</b>         | <b>534.37</b> | <b>352.07</b> |      |                                                                           |
| Aprepitant             | C23H21F7N4O24  | DB00694                    | predicted        | [M+H] <sup>+</sup>       | 20                | 535.00        | 377.08        | 0.7  | <a href="https://go.drugbank.com/drugs">https://go.drugbank.com/drugs</a> |
| <b>D-Delamanid</b>     |                |                            | <b>LC-ESI-QQ</b> | <b>[M+H]<sup>+</sup></b> | <b>25</b>         | <b>538.30</b> | <b>356.07</b> |      |                                                                           |
| <b>Bedaquiline</b>     |                |                            | <b>LC-ESI-QQ</b> | <b>[M+H]<sup>+</sup></b> | <b>35</b>         | <b>555.14</b> | <b>58.16</b>  |      |                                                                           |
| Atorvastatin           | C33H35FN2O5    | MSBNK-Athens_Univ-AU112903 | LC-ESI-QTOF      | [M+H] <sup>+</sup>       | 30                | 559.26        | 440.23        | 99.9 | <a href="https://massbank.eu/MassBank">https://massbank.eu/MassBank</a>   |
| <b>D-Bedaquiline</b>   |                |                            | <b>LC-ESI-QQ</b> | <b>[M+H]<sup>+</sup></b> | <b>35</b>         | <b>561.13</b> | <b>64.13</b>  |      |                                                                           |
| <b>Streptomycin</b>    |                |                            | <b>LC-ESI-QQ</b> | <b>[M+H]<sup>+</sup></b> | <b>35</b>         | <b>582.03</b> | <b>263.10</b> |      |                                                                           |
| <b>Amikacin</b>        |                |                            | <b>LC-ESI-QQ</b> | <b>[M+H]<sup>+</sup></b> | <b>30</b>         | <b>586.06</b> | <b>163.07</b> |      |                                                                           |
| <b>D-Amikacin</b>      |                |                            | <b>LC-ESI-QQ</b> | <b>[M+H]<sup>+</sup></b> | <b>30</b>         | <b>590.11</b> | <b>162.52</b> |      |                                                                           |
| Clarithromycin         | C38H69NO13     | MSBNK-Athens_Univ-AU105303 | LC-ESI-QTOF      | [M+H] <sup>+</sup>       | 30                | 748.48        | 158.12        | 99.9 | <a href="https://massbank.eu/MassBank">https://massbank.eu/MassBank</a>   |
| L-Thyroxine            | C15H11I4NO4    | MSBNK-Athens_Univ-AU274306 | LC-ESI-QTOF      | [M+H] <sup>+</sup>       | ramp<br>31.4-47.1 | 777.69        | 731.69        | 99.9 | <a href="https://massbank.eu/MassBank">https://massbank.eu/MassBank</a>   |
| <b>Rifampicin</b>      |                |                            | <b>LC-ESI-QQ</b> | <b>[M+H]<sup>+</sup></b> | <b>20</b>         | <b>823.46</b> | <b>791.01</b> |      |                                                                           |
| <b>D-Rifampicin</b>    |                |                            | <b>LC-ESI-QQ</b> | <b>[M+H]<sup>+</sup></b> | <b>20</b>         | <b>830.25</b> | <b>798.69</b> |      |                                                                           |
| <b>Rifabutin</b>       |                |                            | <b>LC-ESI-QQ</b> | <b>[M+H]<sup>+</sup></b> | <b>35</b>         | <b>847.02</b> | <b>815.52</b> |      |                                                                           |
| <b>D-Rifabutin</b>     |                |                            | <b>LC-ESI-QQ</b> | <b>[M+H]<sup>+</sup></b> | <b>35</b>         | <b>852.59</b> | <b>821.16</b> |      |                                                                           |
| Nystatin               | C47H75NO17     | MSBNK-Eawag-EQ314002       | LC-ESI-QFT       | [M+H] <sup>+</sup>       | 30                | 926.51        | 107.09        | 99.9 | <a href="https://massbank.eu/MassBank">https://massbank.eu/MassBank</a>   |
| Vancomycin             | C66H75Cl2N9O64 | DB00552                    | predicted        | [M+H] <sup>+</sup>       | 40                | 1450.00       | 100.11        | 24.4 | <a href="https://go.drugbank.com/drugs">https://go.drugbank.com/drugs</a> |

Spectra from massbank.eu and drugbank.com. Spectra were selected if recorded in positive ion mode ([M+H]<sup>+</sup>). Triple-quadrupole mass spectrometer data (LC-ESI-QQ) were preferred over quadrupole/time of flight (LC-ESI-QTOF), and quadrupole/Fourier-transformation (LC-ESI-QFT). Spectra were selected to be recorded with a collision energy of 30 eV or close to 30 eV. Fragmentation prediction in drugbank.com was performed using

---

competitive fragmentation modelling for metabolite identification (<https://cfmid.wishartlab.com>). Light blue: Comedications with a similar precursor ion in a  $\pm 1$  Da range. Dark blue: Comedications with similar transitions in a  $\pm 1$  Da range.

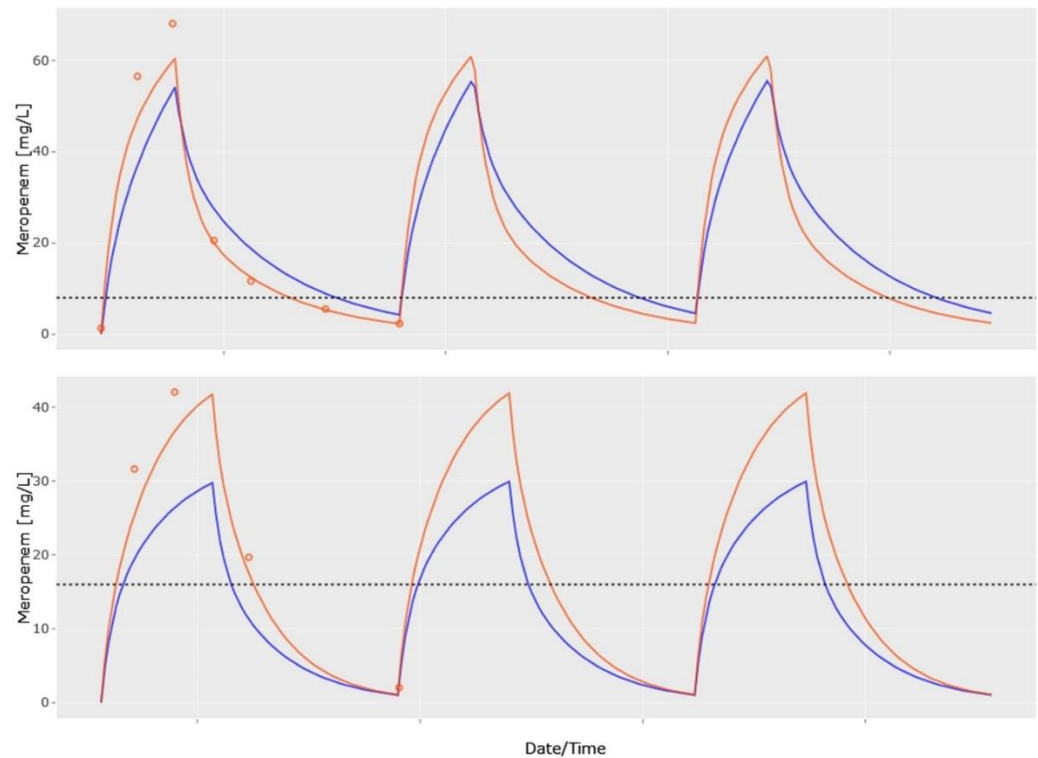

**Figure S4. Model based calculation of meropenem %T>MIC using the web-application TDMx.eu.** Blue line: population pharmacokinetic; orange circles: measured concentrations; orange line: individually predicted pharmacokinetic; dashed black line: minimal inhibitory concentration (MIC) (2-4).

## References

1. Snyder LR, Kirkland JJ, Dolan JW. Basic Concepts and the Control of Separation. Introduction to modern liquid chromatography: John Wiley & Sons; 2009. p. 19-86.
2. Wicha SG. TDMx - Model-Informed Precision Dosing made simple. [Available from: <https://tdmx.eu/>.
3. Wicha SG, Kees MG, Solms A, Minichmayr IK, Kratzer A, Kloft C. TDMx: a novel web-based open-access support tool for optimising antimicrobial dosing regimens in clinical routine. *Int J Antimicrob Agents*. 2015;45(4):442-4.
4. Li C, Kuti JL, Nightingale CH, Nicolau DP. Population pharmacokinetic analysis and dosing regimen optimization of meropenem in adult patients. *J Clin Pharmacol*. 2006;46(10):1171-8.
